1 **Photo sensing and quorum sensing are integrated to control bacterial group behaviors.**

2 Sampriti Mukherjee<sup>1</sup>, Matthew Jemielita<sup>1</sup>, Vasiliki Stergioula<sup>1</sup>, Mikhail Tikhonov<sup>2</sup> and Bonnie L.

3 Bassler<sup>\*1,3</sup>

4

5 <sup>1</sup>Princeton University, Department of Molecular Biology, Princeton, NJ 08544, USA.

6 <sup>2</sup>Physics department, Washington University in St Louis, St Louis, MO 63130, USA.

7 <sup>3</sup>Howard Hughes Medical Institute, Chevy Chase, MD 20815, USA.

8 \*Correspondence to: [bbassler@princeton.edu](mailto:bbassler@princeton.edu)

9

10

11

12

13

14

15

16

17

18

19

20

21 **ABSTRACT**

22 *Pseudomonas aeruginosa* transitions between the free-swimming state and the sessile  
23 biofilm mode during its pathogenic lifestyle. We show that quorum sensing represses *P.*  
24 *aeruginosa* biofilm formation and virulence by activating expression of genes encoding the KinB-  
25 AlgB two-component system. Phospho-AlgB represses biofilm and virulence genes, while KinB  
26 dephosphorylates, and thereby, inactivates AlgB. We discover that the photoreceptor BphP is the  
27 kinase that, in response to light, phosphorylates and activates AlgB. Indeed, exposing *P.*  
28 *aeruginosa* to light represses biofilm formation and virulence gene expression. To our knowledge,  
29 *P. aeruginosa* was not previously known to detect light. The KinB-AlgB-BphP module is present  
30 in all Pseudomonads, and we demonstrate that AlgB is the cognate response regulator for BphP  
31 in diverse bacterial phyla. We propose that KinB-AlgB-BphP constitutes a “three-component”  
32 system and AlgB is the node at which varied sensory information is integrated. This study sets  
33 the stage for light-mediated control of *P. aeruginosa* infectivity.

34

35

36 Keywords: bacteria, *Pseudomonas*, quorum sensing, photo sensing, biofilms, virulence, two-  
37 component system

38

## 39 INTRODUCTION

40 Bacterial responses to self-generated and exogenous stimuli influence their survival,  
41 persistence in particular niches, and lifestyle transitions, such as alterations between being free-  
42 swimming or existing as a member of a biofilm. Biofilms are three-dimensional structured  
43 communities of bacterial cells encased in an extracellular matrix (Flemming and Wingender, 2010;  
44 Flemming et al., 2016). Bacteria living in biofilms exhibit superior resilience to environmental  
45 stresses such as antimicrobials and host immune responses (Flemming et al., 2016; Koo et al.,  
46 2017). While many cues are known to drive the biofilm-planktonic transition, it is largely  
47 mysterious how sensory information is detected, integrated, and transduced to control alterations  
48 between the two lifestyles. Here, we show that photo sensing and quorum sensing converge to  
49 control biofilm formation and virulence in the global pathogen *Pseudomonas aeruginosa*, and we  
50 define the pathway connecting the light and quorum sensing inputs to the virulence and biofilm  
51 outputs.

52 Light is a common environmental cue that is detected by photoreceptors present in all  
53 domains of life (Horst et al., 2007; Kottke et al., 2018). Particular photoreceptor photosensory  
54 domains are activated by specific wavelengths of light (Shcherbakova et al., 2015). In bacteria,  
55 the most abundant photoreceptors are phytochromes (Gomelsky and Hoff, 2011), typically  
56 possessing an amino-terminal chromophore-binding domain and a carboxy-terminal histidine  
57 kinase (HK) domain. Bacteriophytochromes assemble with the chromophore called biliverdin  
58 (Gourinchas et al., 2019). Surprisingly, very few bacteria encode a cognate response regulator  
59 (RR) in close proximity to the gene specifying the bacteriophytochrome (Beattie et al., 2018),  
60 leaving the systems mostly undefined.

61 Another extracellular parameter monitored by bacteria is their cell-population density. To  
62 do this, bacteria use the cell-to-cell communication process called quorum sensing, which relies  
63 on production and detection of extracellular signaling molecules called autoinducers (Mukherjee  
64 and Bassler, 2019). Quorum sensing allows groups of bacteria to synchronously alter behavior in

65 response to changes in the population density and species composition of the vicinal community.  
66 Many pathogenic bacteria require quorum sensing to establish successful infections (Rutherford  
67 and Bassler, 2012).

68 In the human pathogen *Pseudomonas aeruginosa*, quorum sensing is required for  
69 virulence and biofilm formation (Davies et al., 1998; Mukherjee et al., 2017; Rumbaugh et al.,  
70 2000). In this study, we examine the mechanism by which the *P. aeruginosa* RhlR quorum-  
71 sensing receptor represses biofilm formation. A genetic screen reveals that RhlR activates the  
72 expression of the *algB-kinB* operon encoding a two-component system (TCS) in which KinB and  
73 AlgB are the sensor HK and cognate RR, respectively (Figure 1). We find that AlgB~P is a  
74 repressor of biofilm formation and virulence gene expression. KinB is a phosphatase that  
75 dephosphorylates, and thereby inactivates AlgB. Using genetic suppressor analysis, we discover  
76 that BphP is the HK that phosphorylates and activates AlgB, enabling AlgB to repress biofilm  
77 formation and genes encoding virulence factors (Figure 1). BphP is a far-red light sensing  
78 bacteriophytochrome (Tasler et al., 2005), and indeed, we demonstrate that *P. aeruginosa* biofilm  
79 formation and virulence gene expression are repressed by far-red light. Phylogenetic analyses  
80 show that the KinB-AlgB-BphP module is conserved in all Pseudomonads and, moreover, AlgB  
81 is present in the majority of bacteria that possess BphP orthologs. This final finding suggests that  
82 the BphP-AlgB interaction is widespread. As proof of this notion, we show that *P. aeruginosa*  
83 BphP can phosphorylate AlgB orthologs from  $\alpha$ -,  $\beta$ -, and  $\gamma$ -Proteobacteria. Thus, KinB-AlgB-BphP  
84 constitute a “three-component” system, and we propose that AlgB functions as the integrator that  
85 conveys multiple environmental cues including those specifying population density and the  
86 presence or absence of light into the regulation of collective behaviors (Figure 1). We further  
87 predict that AlgB functions as the cognate RR for BphP in all bacteria that possess BphP as an  
88 orphan HK. The downstream signal transduction components and the outputs of photo sensory  
89 cascades are not known in the majority of non-photosynthetic bacteria that possess them making  
90 their physiological roles difficult to discern. This study provides the entire cascade—light as the



91 input, BphP as the detector, AlgB as the signal transducer, and biofilm formation and virulence  
92 factor production as the outputs—enabling unprecedented insight into light-driven control of  
93 bacterial behavior.

94

## 95 RESULTS

96 **KinB activates and AlgB represses RhIR-dependent group behaviors.** We recently  
97 discovered that the *P. aeruginosa* quorum-sensing receptor RhIR represses biofilm formation  
98 (Mukherjee et al., 2017, 2018). Specifically, on Congo red agar biofilm medium, wildtype (WT) *P.*  
99 *aeruginosa* UCBPP-PA14 (hereafter called PA14) exhibits a rugose-center/smooth-periphery  
100 colony biofilm phenotype, while the  $\Delta rhIR$  mutant forms a larger hyper-rugose biofilm (Figure 2A).  
101 To determine the mechanism by which RhIR impedes biofilm formation, we randomly  
102 mutagenized the  $\Delta rhIR$  strain using the Tn5 IS50L derivative IS*lacZ/hah* (Jacobs et al., 2003) and  
103 screened for colonies exhibiting either a WT or a smooth colony biofilm phenotype. Our rationale  
104 was that inactivation of a gene(s) encoding a component that functions downstream of RhIR in  
105 biofilm formation would sever the connection between RhIR and repression of biofilm formation.  
106 We screened 5,000 transposon insertion mutants. Strains harboring insertions located in genes  
107 encoding hypothetical proteins, proteins involved in twitching motility, and proteins required for  
108 Pel polysaccharide synthesis all produced smooth colony biofilms (Table S1). Most of these  
109 genes were already known to play roles in *P. aeruginosa* biofilm formation (Fazli et al., 2014).  
110 Here, we focus on one transposon insertion mutant that exhibited a smooth colony biofilm  
111 phenotype that mapped to the gene *PA14\_72390* encoding the KinB transmembrane HK (Figure  
112 2A) (Chand et al., 2011). *kinB* is located immediately downstream of *algB* in a di-cistron that is  
113 conserved in all sequenced Pseudomonads (Figure S1). To verify that KinB plays a role in biofilm  
114 formation, we generated an in-frame marker-less deletion of *kinB* in the chromosomes of the WT  
115 and the  $\Delta rhIR$  strains. Both the  $\Delta kinB$  single and  $\Delta rhIR \Delta kinB$  double mutants failed to form biofilms

116 and instead exhibited smooth colony phenotypes (Figure 2A). Introduction of a plasmid carrying  
117 the *kinB* gene conferred a hyper-rugose phenotype to the WT and restored biofilm formation to  
118 the  $\Delta kinB$  and  $\Delta rhIR \Delta kinB$  mutants (Figure 2A). By contrast, introduction of a plasmid carrying  
119 *rhIR* did not alter the smooth biofilm phenotype of the  $\Delta rhIR \Delta kinB$  mutant (Figure 2A). We  
120 conclude that, in *P. aeruginosa*, KinB is essential for biofilm formation, KinB is an activator of  
121 biofilm formation, and KinB functions downstream of RhIR in the biofilm formation process.

122 PA14 requires Pel, the primary biofilm matrix exopolysaccharide for biofilm formation  
123 (Friedman and Kolter, 2004) (Note: PA14 does not produce the Psl exopolysaccharide and  
124 alginate does not contribute significantly to the PA14 biofilm matrix, unlike in *P. aeruginosa* PAO1  
125 (Wozniak et al., 2003)). To examine if the mechanism by which KinB alters biofilm formation is by  
126 changing Pel production, we performed quantitative RT-PCR analyses on WT and  $\Delta kinB$  biofilms  
127 probing for the expression of the housekeeping gene *rpoD* and the Pel biosynthetic gene *pelA*  
128 (Figure 2B). Expression of *rpoD* did not change between the WT and the  $\Delta kinB$  mutant, while  
129 transcription of *pelA* was ~14-fold lower in the  $\Delta kinB$  strain than in the WT. We conclude that KinB  
130 activates Pel production, which is why KinB is required for PA14 biofilm formation.

131 KinB is a transmembrane HK that undergoes autophosphorylation and then transfers the  
132 phosphate to its cognate RR AlgB (Ma et al., 1997). To determine if AlgB functions downstream  
133 of KinB to control biofilm formation, we engineered a stop codon in the *algB* gene to obtain an  
134 *algB<sup>STOP</sup>* mutant. This strategy enabled us to prevent AlgB translation without affecting  
135 transcription of *kinB*. The *algB<sup>STOP</sup>* mutant had a biofilm phenotype indistinguishable from the WT  
136 (Figure 2A). However, introduction of the *algB<sup>STOP</sup>* mutation into the  $\Delta kinB$  strain restored biofilm  
137 formation (Figure 2A). Furthermore, overexpression of *algB* repressed biofilm formation in the WT  
138 as evidenced by the resulting smooth colony biofilm phenotype (Figure 2A). Overexpression of  
139 *algB* also repressed biofilm formation in the *algB<sup>STOP</sup>* and  $\Delta rhIR$  strains (Figure 2A). Thus, KinB  
140 activates while AlgB represses biofilm development.

141 AlgB has an amino-terminal domain containing the site of phosphorylation (residue D59),  
142 a central ATP-binding domain, and a carboxy-terminal helix-turn-helix motif for binding DNA  
143 (Figure S2) (Ma et al., 1998). AlgB is a member of the NtrC subfamily of RRs and it possesses  
144 the hallmark GAFTGA motif required for interaction with RpoN ( $\sigma^{54}$ ) (Wozniak and Ohman, 1991).  
145 Typically, NtrC-type RRs act as transcriptional activators when they are phosphorylated (reviewed  
146 in Bush and Dixon, 2012). To investigate if phosphorylation of AlgB is required for repression of  
147 biofilm formation, we substituted the aspartate at residue 59 with an asparagine residue to  
148 preclude phosphorylation. We overexpressed the *algB*<sup>D59N</sup> allele in the PA14 strain carrying the  
149 *algB*<sup>STOP</sup> mutation. Unlike WT AlgB, AlgB<sup>D59N</sup> failed to repress biofilm formation (Figure 2A). To  
150 ensure the validity of this result, we generated amino-terminal 3xFLAG tagged *algB* and *algB*<sup>D59N</sup>  
151 fusions and expressed them from a plasmid in the *algB*<sup>STOP</sup> mutant. Western blot showed that  
152 both proteins are stable (Figure S3A). We conclude that the phosphorylated form of AlgB is active  
153 and is required for AlgB-mediated repression of biofilm development. We presume that AlgB~P  
154 functions indirectly as a transcriptional activator to promote the expression of a gene(s) encoding  
155 a negative regulator of biofilm formation (Figure 1).

156 Our results show that AlgB functions downstream of KinB and that KinB and AlgB have  
157 opposing activities with respect to PA14 biofilm formation. *In vitro*, KinB possess both kinase and  
158 phosphatase activities (Chand et al., 2012). One mechanism by which KinB could antagonize  
159 AlgB function is by acting as a phosphatase that dephosphorylates AlgB, rendering it inactive. To  
160 test this possibility, we integrated the 3xFLAG tagged *algB* allele at the native *algB* locus in the  
161 chromosomes of WT PA14 and the  $\Delta kinB$  mutant. Biofilm analyses show that 3xFLAG-AlgB is  
162 functional (Figure S3B). Next, we assessed the phosphorylation status of 3xFLAG-AlgB *in vivo*.  
163 Figure 2C shows that AlgB~P accumulates in the  $\Delta kinB$  mutant compared to in the WT. To verify  
164 these claims regarding the signal transduction mechanism, we engineered a missense mutation  
165 into KinB at a conserved proline (P390) that is required for phosphatase activity (Chand et al.,

166 2012). Specifically, we generated both *kinB*-SNAP and *kinB*<sup>P390S</sup>-SNAP fusions and introduced  
167 these alleles at the native *kinB* locus on the chromosome of *P. aeruginosa*. Carboxy-terminal  
168 tagging of KinB with SNAP does not interfere with its function as the strain carrying *kinB*-SNAP  
169 forms biofilms that are indistinguishable from those of WT PA14 (Figure S3C and D). The  
170 KinB<sup>P390S</sup>-SNAP protein is also produced and stable (Figure S3C), however, identical to the  $\Delta$ *kinB*  
171 mutant, the strain carrying *kinB*<sup>P390S</sup>-SNAP fails to form biofilms (Figure S3D). These data  
172 demonstrate that KinB acts as a phosphatase to inhibit AlgB function *in vivo*. We therefore  
173 hypothesize, and we come back to this point below, that some other HK must phosphorylate AlgB  
174 to activate it and enable it to function as a repressor of biofilm development.

175 Our data show that the KinB-AlgB TCS functions downstream of RhlR to repress biofilm  
176 formation. An obvious mechanism by which RhlR could influence KinB-AlgB activity is by  
177 activating transcription of the *algB-kinB* operon. Indeed, RT-PCR shows that *algB-kinB* transcript  
178 levels are ~4-fold higher in the WT than in the  $\Delta$ *rhlR* mutant (Figure 2D). Thus, RhlR activates  
179 expression of *algB-kinB* operon. By contrast, deletion of *kinB* has no effect on *rhlR* transcript  
180 levels (Figure 2E), confirming their epistatic relationship.

181 KinB has been reported to be required for pyocyanin production (Chand et al., 2011).  
182 Pyocyanin is a RhlR-dependent virulence factor (Brint and Ohman, 1995; Mukherjee et al., 2017).  
183 Our findings of a regulatory connection between KinB and RhlR suggest that KinB and RhlR could  
184 jointly regulate pyocyanin production. To test this idea, we measured pyocyanin production in  
185 planktonic cultures of WT,  $\Delta$ *rhlR*,  $\Delta$ *kinB*, and  $\Delta$ *rhlR*  $\Delta$ *kinB* strains. Similar to what has been  
186 reported previously, deletion of *rhlR* and/or *kinB* abolished pyocyanin production (Figure 2F).  
187 Overexpression of *rhlR* in the  $\Delta$ *rhlR* strain and overproduction of *kinB* in the  $\Delta$ *kinB* strain restored  
188 pyocyanin production, demonstrating that our expression constructs are functional (Figure 2F).  
189 By contrast, overexpression of either *rhlR* or *kinB* in the  $\Delta$ *rhlR*  $\Delta$ *kinB* double mutant failed to  
190 rescue pyocyanin production (Figure 2F). Thus, RhlR and KinB are both required activators of

191 pyocyanin production in PA14. Consistent with AlgB functioning as the RR for KinB, inactivation  
192 of AlgB (i.e., *algB*<sup>STOP</sup>) in the  $\Delta kinB$  background restored WT levels of pyocyanin production while  
193 overexpression of AlgB in the WT and the *algB*<sup>STOP</sup> mutant reduced pyocyanin levels (Figure 2F).  
194 Lastly, unlike WT AlgB, overexpression of AlgB<sup>D59N</sup> failed to repress pyocyanin production  
195 suggesting that phosphorylation of AlgB is required for AlgB activity (Figure 2F).

196 To further explore the role of the KinB-AlgB TCS on RhIR-driven gene expression, we  
197 quantified expression of four other RhIR-activated genes (Mukherjee et al., 2017): *hsiC2* (type-VI  
198 secretion), *hcnA* (hydrogen cyanide synthase), *lecA* (galactose-binding lectin), and *lecB* (fucose-  
199 binding lectin), all encoding virulence factors, in the WT and the  $\Delta kinB$  mutant. Expression of all  
200 four genes was lower in the  $\Delta kinB$  mutant than in the WT (Figure 2G). Introduction of the *algB*<sup>STOP</sup>  
201 mutation into the  $\Delta kinB$  mutant restored expression of all four virulence genes to WT levels (Figure  
202 2G). Thus, both RhIR and KinB activate virulence gene expression in *P. aeruginosa*. Moreover,  
203 we conclude that AlgB is epistatic to KinB for all the phenotypes tested here, and thus KinB and  
204 AlgB function in the same pathway, albeit in opposing manners, to control biofilm formation and  
205 virulence factor production.

206

207 **The bacteriophytochrome BphP is the HK required to activate AlgB to mediate repression**  
208 **of quorum-sensing-controlled behaviors.** We have invoked the existence of a putative HK to  
209 activate AlgB via phosphorylation. To identify this component, we used genetic suppressor  
210 analysis reasoning that mutants with defects in the upstream component required to  
211 phosphorylate AlgB would render AlgB non-functional. We further reasoned that such suppressor  
212 mutants would transform the  $\Delta kinB$  smooth colony biofilm phenotype back to the rugose  
213 phenotype because in such mutants, AlgB could not act as a repressor of biofilm formation. We  
214 isolated 12 spontaneously-arising rugose mutants from  $\Delta kinB$  smooth colony biofilms and  
215 analyzed them by whole genome sequencing (Figure 3A). Eight suppressors contained deletions

216 or missense mutations in the *algB* gene, while the remaining four suppressors harbored mutations  
217 in the *bphP* gene (Figure 3B, Table S2). *bphP* is located in a di-cistron immediately downstream  
218 of *bphO* (Figure 3B, S1). We discuss *bphO* below; here we focus on *bphP*. Exactly analogous to  
219 mutation of *algB*, mutation of *bphP* was epistatic to *kinB* for all of the phenotypes tested.  
220 Specifically, engineering a STOP codon into the *bphP* gene showed no effect in WT PA14, but it  
221 restored biofilm formation, pyocyanin production, and virulence gene expression to the  $\Delta kinB$   
222 mutant (Figures 3C, D, and 2G). Consistent with BphP being required to activate AlgB, unlike in  
223 the WT, in the *bphP*<sup>STOP</sup> mutant, overexpression of *algB* failed to repress biofilm formation and  
224 pyocyanin production (Figure 3C, D). Furthermore, while overexpression of *bphP* in the WT  
225 reduced pyocyanin production to the levels of the  $\Delta kinB$  mutant, overexpression of *bphP* had no  
226 effect in the *algB*<sup>STOP</sup> mutant (Figure 3D). There is a severe growth defect associated with the  
227 overexpression of *bphP*. For this reason, in Figure 3D, rather than using plasmid pUCP18, we  
228 expressed *bphP* from the low copy number plasmid pBBR1-MCS5. Unfortunately, the presence  
229 of the empty pBBR-MCS5 plasmid in WT and mutant PA14 strains abrogates biofilm formation,  
230 so we could not perform the companion biofilm assay to test overexpression of *bphP*.  
231 Nonetheless, we can conclude from Figure 3C and 3D that BphP is necessary and sufficient to  
232 activate AlgB.

233 BphP is a bacteriophytochrome that assembles with its chromophore biliverdin, which is  
234 produced by the heme oxygenase BphO (Figure 3B and S1) to generate a photo-sensing HK that  
235 is activated by light (Bhoo et al., 2001). *P. aeruginosa* BphP contains the HDLRNPL motif that  
236 often contains the histidine residue that undergoes autophosphorylation in transmembrane HKs  
237 (Bhate et al., 2015). In *P. aeruginosa* BphP, this histidine is residue 513. To determine if BphP  
238 kinase activity is required for AlgB activation, we generated the *bphP*<sup>H513A</sup> mutation, fused it to  
239 3xFLAG, and introduced it onto the chromosome of the  $\Delta kinB$  mutant. The BphP<sup>H513A</sup>-3xFLAG  
240 protein is produced and stable (Figure S3E), and identically to the *bphP*<sup>STOP</sup> allele, the *bphP*<sup>H513A</sup>

241 mutation restored biofilm formation and pyocyanin production to the  $\Delta kinB$  mutant (Figure 3C, D).  
242 Moreover, overexpression of *algB* in the *bphP<sup>H513A</sup>* mutant failed to repress biofilm formation and  
243 pyocyanin production (Figure 3C, D). These results show that BphP H513 and AlgB D59 are  
244 required for signal transmission, and the signal is presumably phosphorylation.

245 To assess phospho-relay between BphP and AlgB, we used our 3xFLAG-AlgB *in vivo*  
246 construct. In addition to introducing it into the chromosome of WT PA14, we engineered it onto  
247 the chromosome of the *bphP<sup>STOP</sup>* mutant. Consistent with BphP being the kinase for AlgB, Figure  
248 2C shows that the  $\Delta kinB$  *bphP<sup>STOP</sup>* mutant lacks the band corresponding to AlgB~P. These data  
249 suggest that BphP transfers phosphate to AlgB. To verify this finding, we performed *in vitro*  
250 phospho-transfer assays. We purified recombinant BphP and formed a complex with it and  
251 commercially-available biliverdin (BV) to obtain the BphP-BV chromoprotein. Upon incubation  
252 with radiolabeled ATP, BphP-BV underwent autophosphorylation (Figure 3E). BphP-BV readily  
253 transferred radiolabeled phosphate to purified AlgB but not to AlgB<sup>D59N</sup> (Figures 3E, S4A). Purified  
254 BphP<sup>H513A</sup> complexed with BV failed to autophosphorylate and thus could not transfer phosphate  
255 to AlgB (Figure S4A). Together, these data show that BphP-BV phosphorylates and thereby  
256 activates AlgB.

257 Our data suggest that KinB dephosphorylates AlgB while BphP phosphorylates AlgB. To  
258 directly test this hypothesis, we reconstituted the BphP-AlgB-KinB phosphorelay *in vitro*. We  
259 purified the recombinant KinB and KinB<sup>P390S</sup> proteins and added them separately, at equimolar  
260 concentration, to AlgB~P pre-phosphorylated by BphP-BV. Figure 3F shows that over time, KinB  
261 dephosphorylates AlgB while AlgB~P levels remain unchanged in the presence of KinB<sup>P390S</sup>. As  
262 control experiments, we added either KinB or KinB<sup>P390S</sup> to AlgB in the presence of ATP but in the  
263 absence of BphP-BV. Both KinB and KinB<sup>P390S</sup> underwent autophosphorylation and transferred  
264 phosphate to AlgB *in vitro*, but only WT KinB acted as a phosphatase to dephosphorylate AlgB  
265 (Figure S4B-D). Although our findings show that KinB is a dual kinase/phosphatase, under our *in*



266 *vivo* conditions, only KinB phosphatase activity was detected. Perhaps KinB can function as a  
267 kinase for AlgB when its stimulus is present (Figure 1). Identifying the natural signal that drives  
268 the KinB kinase activity is the subject of our future work. We conclude that BphP-AlgB-KinB forms  
269 a “three-component” system in which the RR AlgB is activated by the kinase activity of the HK  
270 BphP and inhibited by the phosphatase activity of the HK KinB.

271

272 **BphP-mediated photo sensing represses *P. aeruginosa* quorum-sensing-controlled**  
273 **behaviors.** The *P. aeruginosa* BphP bacteriophytochrome has been studied *in vitro* and its kinase  
274 activity is reported to be activated by light (Bhoo et al., 2001). To explore whether BphP photo  
275 sensing has any effect on AlgB-controlled group behaviors *in vivo*, we compared biofilm formation  
276 by WT,  $\Delta kinB$ ,  $\Delta kinB bphP^{STOP}$ , and  $\Delta kinB algB^{STOP}$  PA14 strains in the dark and under different  
277 light conditions. We note that all of the biofilm experiments in the previous sections were  
278 performed under ambient light. First, we consider WT PA14 and the  $\Delta kinB$  mutant in the no light  
279 condition. Figure 4A shows that, in the dark, both strains formed biofilms that were  
280 indistinguishable from one another. We interpret these results to mean that in the absence of light,  
281 the BphP kinase is inactive in both WT PA14 and the  $\Delta kinB$  mutant, AlgB is not phosphorylated,  
282 so it too is inactive, and thus, no repression of biofilm formation occurs (Figure 1). Now we address  
283 the results under ambient light. WT PA14 formed biofilms but the  $\Delta kinB$  strain did not (Figure 4A).  
284 Our interpretation is that, in the WT, ambient light activates the BphP kinase and phosphotransfer  
285 to AlgB occurs. However, the opposing KinB phosphatase activity strips the phosphate from AlgB,  
286 thereby eliminating AlgB-dependent repression of biofilm formation. Thus, WT PA14 forms  
287 biofilms under ambient light. In the case of the  $\Delta kinB$  mutant, since there is no KinB phosphatase  
288 present, ambient light is sufficient to drive BphP-mediated phosphorylation of AlgB, AlgB~P  
289 accumulates, and it represses biofilm formation. Based on these results, we infer that the  
290 presence or absence of light can alter group behaviors such as biofilm formation in *P. aeruginosa*.



291 Ambient light is a composite of different wavelengths of light. The PA14 BphP  
292 bacteriophytochrome is reported to be a far-red light sensing HK *in vitro* (Tasler et al., 2005). We  
293 wondered if a particular wavelength of light could maximally activate the BphP kinase activity *in*  
294 *vivo*, and if so, perhaps, under that condition, the BphP kinase activity could override the KinB  
295 phosphatase, enabling light to repress biofilm formation in WT PA14. To test this notion, we  
296 exposed PA14 strains to blue, red, and far-red light and monitored biofilm formation. In contrast  
297 to WT PA14, the  $\Delta kinB$  mutant failed to form biofilms under blue and red light, suggesting that  
298 BphP is a promiscuous photoreceptor that is activated by blue and red light (Figure 4A).  
299 Importantly, when WT PA14 was exposed to far-red light, it failed to make biofilms, but rather,  
300 exhibited the smooth phenotype identical to the  $\Delta kinB$  mutant (Figure 4A). We conclude that far-  
301 red light is the preferred wavelength for BphP and is sufficient to repress biofilm formation in WT  
302 *P. aeruginosa*. Finally, we show that light-mediated repression of biofilm formation requires  
303 functional BphP and AlgB as both the  $\Delta kinB bphP^{STOP}$  and  $\Delta kinB algB^{STOP}$  mutants did not repress  
304 biofilm formation under the conditions tested (Figure 4A).

305 One mechanism by which light could suppress biofilm formation via BphP-AlgB is by  
306 down-regulating Pel production. To test this idea, we performed quantitative RT-PCR analyses  
307 on WT,  $\Delta kinB$ ,  $\Delta kinB algB^{STOP}$ , and  $\Delta kinB bphP^{STOP}$  biofilms in darkness and under ambient and  
308 far-red light and we quantified *pelA* transcript levels (Figure 4B). We used *rpoD* transcription as  
309 the control. Expression of *rpoD* did not change under any condition tested. Regarding *pelA*,  
310 analogous to what occurred for biofilm formation, there was no significant difference in *pelA*  
311 expression between the WT and the  $\Delta kinB$  strain in the dark, whereas transcription of *pelA* was  
312 ~14-fold lower in the  $\Delta kinB$  strain than in the WT under ambient light. Repression of *pelA*  
313 expression depended on functional BphP and AlgB as the  $\Delta kinB bphP^{STOP}$  and  $\Delta kinB algB^{STOP}$   
314 mutants transcribed *pelA* at high levels under both conditions. We conclude that  
315 dephosphorylation of AlgB does not occur in the  $\Delta kinB$  mutant under ambient light. In this

316 condition, BphP phosphorylates AlgB and AlgB~P represses biofilm formation via down-  
317 regulation of *peIA* expression. Lastly, in the WT, *peIA* transcript levels were ~4-fold lower under  
318 far-red light than in darkness. Therefore, far-red light is the strongest activator of BphP such that  
319 under far-red light, but not ambient light, the kinase activity of BphP overrides the phosphatase  
320 activity of KinB in the WT to drive AlgB~P accumulation, repression of *peIA* expression, and  
321 consequently, repression of biofilm formation.

322 In Figure 2, we showed that BphP is required for AlgB-dependent repression of virulence  
323 gene expression. Our results in Figure 4 suggest that light, by controlling BphP-dependent  
324 phosphorylation of AlgB, could control virulence in *P. aeruginosa*. To explore this idea further, we  
325 quantified the expression of the virulence-associated genes, *hsiC2*, *hcnA*, *lecA*, and *lecB* in  
326 biofilms of WT PA14 and in the  $\Delta kinB$ ,  $\Delta kinB algB^{STOP}$ , and  $\Delta kinB bphP^{STOP}$  strains under  
327 darkness, ambient light, and far-red light. The results mirror those for biofilm formation and *peIA*  
328 transcription. Only in the absence of the opposing KinB phosphatase activity is ambient light  
329 sufficient to activate BphP, whereas far-red light-driven BphP kinase activity can override the KinB  
330 phosphatase activity allowing accumulation of AlgB~P to levels that repress virulence gene  
331 expression. Again, light-mediated repression of virulence genes requires functional BphP and  
332 AlgB (Figure 4C). We conclude that BphP-dependent photo sensing represses virulence gene  
333 expression in *P. aeruginosa*.

334 Light possess both color (wavelength) and intensity properties. Above, we demonstrated  
335 that BphP can detect blue, red, and far-red light. To explore the possibility that *P. aeruginosa*  
336 BphP is also capable of detecting light intensity, we varied the intensity of far-red light since it has  
337 the most dramatic effect on PA14 phenotypes. We used repression of biofilm formation as the  
338 readout. Biofilm formation decreased with increasing intensity of far-red light in the WT and  $\Delta kinB$   
339 mutant but remained unaltered in the  $bphP^{STOP}$  mutant (Figure 5A). The highest intensity of light  
340 we tested (bottom-most panel in Figure 5A) is similar to that present in natural sunlight (5.5 W/m<sup>2</sup>)

341 in a 5 nm window around 730 nm; ASTM G173-03 Reference Solar Spectra, [www.astm.org](http://www.astm.org)). At  
342 this intensity, WT biofilm formation was maximally repressed showing that BphP kinase  
343 dominates over KinB phosphatase. The  $\Delta kinB$  mutant generates suppressor flares under this  
344 condition, suggesting that one role of the KinB phosphatase is to keep the BphP kinase activity  
345 in check. To verify that far-red light specifically altered biofilm behavior without affecting general  
346 physiology, we quantified *rpoD* and *pelA* transcript levels in the WT and *bphP<sup>STOP</sup>* mutant biofilm  
347 samples grown under the different light intensities (Figure 5B). Expression of *rpoD* did not change  
348 under any condition tested, while transcription of *pelA* decreased progressively in the WT with  
349 increasing intensity of far-red light. At the highest intensity of far-red light tested, expression of  
350 *pelA* was ~12-fold lower than that in the *bphP<sup>STOP</sup>* mutant that cannot convey the light cue  
351 internally to AlgB. These results demonstrate that *P. aeruginosa* biofilm formation can be  
352 modulated simply by tuning the intensity of far-red light in which the strain is grown.

353

354 **The BphP-AlgB interaction is conserved in diverse bacteria.** BphP bacteriophytochromes are  
355 a major class of photoreceptors widely distributed in non-photosynthetic bacteria (Gomelsky and  
356 Hoff, 2011). These BphP HKs either lack a partner RR, or when they are co-transcribed with a  
357 cognate RR gene, the physiological output of the circuit is unknown. Thus, the downstream  
358 signaling components and consequences of photo sensing in non-photosynthetic bacteria are not  
359 understood. Our discovery of AlgB as the cognate RR for the orphan light sensing BphP HK in a  
360 non-photosynthetic bacterium, coupled with our demonstration of the biofilm and virulence outputs  
361 of photo sensing, puts us in a position to test the generality of our findings. As a first step, we  
362 generated a phylogenetic tree containing 150 BphP orthologs that are the closest homologs to *P.*  
363 *aeruginosa* BphP (Figure 6A, S5). The majority of these BphP orthologs are present in non-  
364 photosynthetic bacteria from diverse phyla. The Pseudomonads fall into discrete clusters hinting  
365 at acquisition of BphP via horizontal gene transfer. With respect to AlgB and KinB, we find that,  
366 while KinB is present only in the Pseudomonads, *Acinetobacter baumannii*, and *Enterobacter*

367 *cloacae* (Figure 6A, S1, S5), AlgB is present in ~93% of the bacterial species in our BphP-based  
368 phylogenetic tree (Figure 6A, S5). We note that in all of the bacteria that do not encode AlgB, for  
369 example, *Deinococcus* spp., BphR is the cognate RR for BphP (Figure 6A, S1, 2, 5, and Bhoo et  
370 al., 2001). None of these *bphP*-encoding bacteria possesses both BphR and AlgB. Therefore, the  
371 pattern that emerges is that BphB is widely distributed in non-photosynthetic bacteria and the  
372 cognate RR is either AlgB or BphR.

373 To test if BphP can interact with and phosphorylate AlgB in bacteria other than *P.*  
374 *aeruginosa*, we purified AlgB orthologs from diverse Proteobacteria: *Rhodospirillum centenum*  
375 ( $\alpha$ ), *Achromobacter xylosoxidans* ( $\beta$ ) and *Pseudomonas putida* ( $\gamma$ ). We incubated these AlgB  
376 proteins with an equimolar concentration of autophosphorylated *P. aeruginosa* BphP-BV.  
377 Phosphotransfer from BphP-BV to the AlgB orthologs occurred in all cases, albeit to varying  
378 degrees (Figure 6B). To eliminate the possibility that BphP-BV is a promiscuous kinase for NtrC  
379 family RRs, we purified NtrC from *P. aeruginosa* and incubated with autophosphorylated BphP-  
380 BV. BphP-BV failed to phosphorylate NtrC (Figure 6B). We conclude that BphP is the specific HK  
381 for AlgB, and AlgB appears to have a conserved function in photosensory signal transduction in  
382 diverse bacteria.

383

## 384 **DISCUSSION**

385 Our study reveals that the non-photosynthetic pathogenic bacterium *P. aeruginosa*  
386 detects and responds to light to repress group behaviors including virulence factor production and  
387 biofilm formation. The photoreceptor BphP functions as a light-activated HK that phosphorylates  
388 the AlgB RR. AlgB~P represses group behaviors but is antagonized by its canonical HK KinB.  
389 Specifically, KinB dephosphorylates AlgB, and thus, KinB functions as an activator of group  
390 behaviors. Our work shows that AlgB functions as a hub protein that has three inputs -- quorum  
391 sensing via RhIR, photo sensing via BphP, and an unknown signal via KinB. While quorum  
392 sensing activates *algB* expression, photo sensing activates AlgB function, and thus the presence

393 or absence of light can override the quorum-sensing input from RhIR. We reason that, at high cell  
394 density, RhIR will drive AlgB production. However, if there is no light, BphP will not phosphorylate  
395 and activate AlgB. In turn, AlgB will not repress group behaviors. To our knowledge, the BphP-  
396 AlgB photosensory signal transduction cascade represents the first example of light-mediated  
397 control of group behaviors in the global pathogen *P. aeruginosa*.

398 Light is a ubiquitous source of energy that drives the anabolic process of photosynthesis  
399 in photosynthetic organisms. However, the wide distribution of photoreceptors in all domains of  
400 life suggests roles for photo sensing in behaviors far beyond photosynthesis. Plants, for example,  
401 use light cues to regulate activities such as seed germination (Mathews, 2006), stomatal opening  
402 (Shimazaki et al., 2007), and defenses against microbes (Bhardwaj et al., 2011; Neukermans et  
403 al., 2012; Roden and Ingle, 2009). Furthermore, plant vascular systems can function as bundles  
404 of optical fibers to efficiently transmit light, particularly far-red light, that is not absorbed by plant  
405 pigments, allowing opportunities for photo sensing in roots and possibly in the rhizosphere (Lee  
406 et al., 2016). Many of the *bphP*-encoding bacteria from the phylogenetic tree in Figure 6A that  
407 also possess AlgB, are members of the rhizosphere microbiome (Duran et al., 2018). Perhaps  
408 these non-photosynthetic bacteria exploit light cues to colonize and/or to fine-tune their mutualistic  
409 or pathogenic interactions with their plant hosts as well as adjust their physiology in the  
410 rhizosphere.

411 Light provides spatial and temporal information to higher organisms. Does light serve a  
412 similar purpose in bacteria? Recent studies have reported that BphP plays a role in multiple  
413 stages of infection by the foliar plant pathogens *Xanthomonas campestris pv. campestris* and  
414 *Pseudomonas syringae pv. syringae* (Bonomi et al., 2016; Wu et al., 2013), in each case, via an  
415 unknown but putative downstream RR. Based on our phylogenetic analysis, we speculate that  
416 AlgB fulfills this role. We further speculate that *P. aeruginosa*, which is a plant pathogen (Starkey  
417 and Rahme, 2009), responds to light cues via the BphP-AlgB TCS to appropriately modulate its  
418 biofilm and virulence programs, particularly, to inhibit virulence during daylight enabling avoidance

419 of plant defense mechanisms. For instance, during the day, chlorophyll in leaves removes most  
420 of the red wavelength from sunlight but little of the far-red spectrum (Smith, 2000). Thus, far-red  
421 light is readily available, and based on our work here, could signal to *P. aeruginosa* to tamp down  
422 virulence factor production and biofilm formation, allowing it to optimize those programs in line  
423 with host conditions as shaded leaves are more susceptible to infection than leaves exposed to  
424 direct light (de Wit, 2013).

425 In addition to providing spatial-temporal information, light can also reveal other key  
426 parameters to which bacteria respond. Photoreceptors fall into six families depending on the  
427 structure of the light-absorbing chromophore: rhodopsins, xanthopsins, cryptochromes, LOV  
428 domain-containing phototropins, blue-light sensing using flavin (BLUF)-domain proteins, and  
429 phytochromes (Kottke et al., 2018; Shcherbakova et al., 2015). Detection of blue light via LOV  
430 and BLUF domain proteins modulates general stress responses in some non-photosynthetic  
431 bacteria such as *Bacillus subtilis* and *Caulobacter crescentus* (A´vila-Pe´rez, et al., 2006; Purcell  
432 et al., 2007). Light, through the LOV-HK of the mammalian pathogen *Brucella abortus* is crucial  
433 for virulence in a macrophage infection model, although the components connecting light to the  
434 virulence response remain undefined. It is also proposed that *B. abortus* uses light as an indicator  
435 of whether it is inside or outside of its animal host (Swartz et al., 2007). The *P. aeruginosa* genome  
436 does not encode LOV or BLUF domain proteins (Horst et al., 2007). *P. aeruginosa*, possesses  
437 only one identifiable photoreceptor, BphP (Horst et al., 2007). Nonetheless, we showed that *P.*  
438 *aeruginosa* is capable of detecting blue, red, and far-red light via BphP (Figure 4A). Perhaps, an  
439 advantage of BphP promiscuity is that it enables detection of higher energy, and therefore,  
440 phototoxic blue light, in addition to the lower energy but highly penetrative far-red light. Such a  
441 scenario would endow *P. aeruginosa* with the plasticity to diversify its physiological outputs in  
442 response to particular wavelengths of light, without the necessity of a distinct photoreceptor for  
443 each wavelength. We do not yet know the molecular mechanisms that permit BphP to detect blue,

444 red, and far-red light, whether there are one or multiple chromophores involved, and whether  
445 there exist different output regulons for different input light wavelengths.

446 An advantage *P. aeruginosa* could accrue by sensing light on or within a mammalian host  
447 would be the ability to tune into the host circadian rhythm and its associated responses. Circadian  
448 clocks influence various aspects of health and disease such as sleep/wake cycles and  
449 metabolism (Curtis et al., 2014; Scheiermann et al., 2013). Disruption of circadian rhythms are  
450 associated with fitness costs (Scheiermann et al., 2013). In mammals, both innate and adaptive  
451 immune responses are controlled by the circadian clock such that the immune system is primed  
452 to combat pathogens during the host active phase while immune functions undergo regeneration  
453 and repair during the resting phase of the daily cycle. Parasites such as *Plasmodium* spp. that  
454 cause malaria, synchronize their replication cycle with host circadian rhythms for optimized  
455 infection and dissemination (Donnell et al., 2011). Likewise, viruses such as Herpes and Influenza  
456 A have been shown to exploit the mammalian circadian clock for their own gain i.e., to successfully  
457 avoid host immune responses enabling maximal replication (Edgar et al., 2016; Sundar et al.,  
458 2015). Furthermore, the human body emits light, albeit at 1,000-fold lower intensity than is visible  
459 to the naked eye, but intriguingly, photon emission peaks during the day and is lowest at night,  
460 and therefore, might be controlled by the endogenous circadian clock (Kobayashi et al., 2009).  
461 Perhaps, *P. aeruginosa* uses light as a signal that reveals when the host immune response is at  
462 peak function, and accordingly, at that time, *P. aeruginosa* represses biofilm formation and  
463 virulence factor expression as a mechanism that enhances evasion of host defenses. If so, a  
464 human host infected with *P. aeruginosa* during the night would be colonized to higher levels,  
465 compared to a host acquiring an infection during the day. Synchronizing infectivity with light/dark  
466 cues to enable optimal infection could be a common feature of non-photosynthetic photoreceptor-  
467 harboring pathogens.

468 *P. aeruginosa* is a priority pathogen on the CDC (Centers for Disease Control and  
469 Prevention) ESKAPE pathogen list (a set of bacteria including *Enterococcus faecium*,



470 *Staphylococcus aureus*, *Klebsiella pneumoniae*, *Acinetobacter baumannii*, *P. aeruginosa* and  
471 *Enterobacter* spp. that are designated as multi-drug resistant pathogens requiring new  
472 antimicrobials for treatment), and a critical pathogen on the WHO (World Health Organization)  
473 priority list (Rice, 2008; Pendleton et al., 2013; Tacconelli et al., 2017). Our phylogenetic analysis  
474 suggests that the KinB-AlgB-BphP module is conserved in the genomes of *A. baumannii* and  
475 *Enterobacter cloacae*, perhaps acquired from *P. aeruginosa* via horizontal gene transfer, as the  
476 AlgB primary sequence is nearly identical between the three species. We speculate that, beyond  
477 *P. aeruginosa*, BphP-AlgB-dependent photo sensing also affects the physiology, and possibly the  
478 virulence of these ESKAPE pathogens. Collectively, the results from this study provide  
479 unanticipated insight into *P. aeruginosa* physiology and a surprising possibility for therapeutic  
480 intervention—shining light on a deadly and actively studied pathogen, *P. aeruginosa*, to attenuate  
481 virulence and biofilm formation.

482

483



484 **ACKNOWLEDGEMENTS**

485 We thank Wei Wang and the Genomics Core Facility at Princeton University for help with whole  
486 genome sequencing. We thank Ned Wingreen, Anne-Florence Bitbol, Joseph E. Sanfillipo, and  
487 all members of the Bassler group for thoughtful discussions. This work was supported by the  
488 Howard Hughes Medical Institute, NIH Grant 5R37GM065859, and National Science foundation  
489 Grant MCB-1713731 to B.L.B., and a NIH Grant 1K99GM129424-01 to S.M.

490

491 **AUTHOR CONTRIBUTIONS**

492 S.M., V.S. and M.J. conducted experiments; S.M. and M.T. analyzed data; S.M., M.J. and B.L.B.  
493 designed the experiments; S.M. and B.L.B. wrote the paper.

494

495 **DECLARATION OF INTERESTS**

496 The authors declare no competing interests.

497

498 **FIGURE LEGENDS**

499 **Figure 1: Model for *P. aeruginosa* integration of quorum-sensing and photo-sensing**  
500 **information into the control of virulence and biofilm development.** The RhIR quorum-sensing  
501 receptor binds its cognate autoinducer (AI) produced by either the RhII or PqsE autoinducer  
502 synthase (black circles) at high cell density (Mukherjee et al., 2018). The RhIR-AI complex  
503 represses biofilm formation and virulence gene expression by activating transcription of the *algB-*  
504 *kinB* operon encoding the KinB HK and the AlgB RR, the latter a repressor of biofilm formation.  
505 KinB antagonizes AlgB by dephosphorylation. The stimulus (blue hexagon) for KinB is unknown.  
506 Photo sensing stimulates the BphP HK to auto-phosphorylate, and subsequently transfer the  
507 phosphoryl group to AlgB to activate AlgB. AlgB~P activates transcription of genes required for  
508 repression of group behaviors such as biofilm formation and virulence. A “P” in a circle denotes  
509 addition or removal of a phosphate moiety. X denotes that the genes functioning downstream of  
510 AlgB in the process are not known. The RhIR-AI complex directly activates virulence gene  
511 expression and also represses biofilm formation by additional unknown mechanisms (dotted line).

512  
513 **Figure 2: RhIR represses biofilm formation via KinB.** A) Colony biofilm phenotypes of WT  
514 PA14 and the designated mutants on Congo red agar medium after 72 h of growth. *kinB::Tn* refers  
515 to a mutant identified in a genetic screen harboring a transposon insertion in *kinB*. *pkinB*, *prhIR*,  
516 and *palgB* refer to *kinB*, *rhIR*, and *algB*, respectively, under the  $P_{lac}$  promoter on pUCP18. Scale  
517 bar for all images is 2 mm. B) Relative expression levels of *rpoD* and *pelA* measured by qRT-  
518 PCR in WT and  $\Delta kinB$  mutant biofilms grown as in (A). C) Phos-tag Western blot analysis of the  
519 indicated strains probed for 3xFLAG-AlgB. D) Relative *algB* transcript levels measured by qRT-  
520 PCR in WT PA14 and the  $\Delta rhIR$  mutant grown planktonically to  $OD_{600} = 1.0$ . E) Relative *rhIR*  
521 transcript levels measured by qRT-PCR in WT PA14 and the  $\Delta kinB$  mutant grown planktonically  
522 to  $OD_{600} = 1.0$ . F) Pyocyanin production ( $OD_{695}$ ) was measured in WT PA14 and the designated  
523 mutants. Production from the WT was set to 100%. G) Relative expression of *rpoD*, *hsiC2*, *hcnA*,

524 *lecA*, and *lecB* measured by qRT-PCR in WT PA14 and the designated mutants grown  
525 planktonically to  $OD_{600} = 1.0$ . *rpoD* is used as the control for comparison. For panels B, D, E and  
526 G, data were normalized to 16S RNA levels and the WT levels were set to 1.0. AU denotes  
527 arbitrary units. For data in panels B, D, E, F, and G, error bars represent standard error of the  
528 mean (SEM) for three biological replicates.

529

530 **Figure 3: BphP is the cognate HK for AlgB.** A) Shown is a representative isolation of a  
531 suppressor mutation of the  $\Delta kinB$  smooth biofilm phenotype. The white arrow in the left panel  
532 indicates a region of rugose sectoring in the  $\Delta kinB$  smooth biofilm that is diagnostic of the  
533 emergence of a suppressor mutation. The right panel shows the biofilm phenotype of a mutant  
534 following isolation. B) Chromosomal arrangements of the *algB* (red), *kinB* (blue), *bphO* (yellow),  
535 and *bphP* (green) genes. Large white arrows represent open reading frames (lengths not to  
536 scale), black bent arrows indicate promoters, and black circles indicate the locations of  
537 suppressor mutations. C) Colony biofilm phenotypes of WT PA14 and the designated mutants on  
538 Congo red agar medium after 72 h of growth. *palgB* refers to *algB* under the  $P_{lac}$  promoter on the  
539 pUCP18 plasmid. Scale bar is 2 mm for all images. D) Pyocyanin production ( $OD_{695}$ ) was  
540 measured in WT PA14 and the designated mutants. *pbphP* refers to *bphP* under the  $P_{lac}$  promoter  
541 on the pBBR-MCS5 plasmid. Error bars represent SEM for three biological replicates. E)  
542 Autophosphorylation of BphP-BV and phosphotransfer to AlgB. (Left) Autophosphorylation of  
543 BphP-BV was carried out for 30 min and samples were removed at the indicated times for  
544 electrophoresis. (Right) An equimolar amount of AlgB was added to P~BphP-BV for 30 min and  
545 samples were removed at the indicated times for electrophoresis. F) Dephosphorylation of  
546 AlgB~P by KinB or KinB<sup>P390S</sup>. Phosphotransfer to AlgB from P~BphP-BV was carried out for 30  
547 min. ATP was removed from the reaction, and either KinB or KinB<sup>P390S</sup> was added. Samples were  
548 removed at the indicated times for electrophoresis. The top panel shows representative images

549 of gels. The bottom graph shows % AlgB~P levels at each time point with SEM for three  
550 independent replicates. Band intensities for AlgB~P when KinB was added (circles) and when  
551 KinB<sup>P390S</sup> was added (squares) were normalized to the level at time zero level.

552

553 **Figure 4: Photo sensing represses group behaviors in *P. aeruginosa*.** A) Colony biofilm  
554 phenotypes are shown for WT PA14 and the designated mutants on Congo red agar medium  
555 after 72 h of growth under the indicated light conditions. Scale bar is 2 mm for all images. B)  
556 Relative expression of *rpoD* and *pelA* as measured by qRT-PCR in WT PA14 and the designated  
557 mutant strains grown as biofilms as in (A) in darkness, ambient light, and far-red light. C) Relative  
558 expression of *hsiC2*, *hcnA*, *lecA*, and *lecB* measured by qRT-PCR in WT PA14 and the  
559 designated mutants grown as biofilms as in (A) and light conditions as in (B). For panels B and  
560 C, data were normalized to 16S RNA levels and the WT levels were set to 1.0. AU denotes  
561 arbitrary units and error bars represent SEM for three biological replicates.

562

563 **Figure 5: Far-red light intensity controls biofilm formation.** A) Colony biofilm phenotypes are  
564 shown for WT PA14 and the designated mutants on Congo red agar medium after 72 h of growth  
565 under the indicated far-red light intensities. Scale bar is 2 mm for all images. B) Relative  
566 expression of *rpoD* (squares) and *pelA* (circles) measured by qRT-PCR in WT PA14 (black) and  
567 in the *bphP*<sup>STOP</sup> mutant (green) grown as biofilms as in (A). Data were normalized to 16S RNA  
568 levels and the WT levels at 0 mW/m<sup>2</sup> far-red light were set to 1.0. AU denotes arbitrary units and  
569 error bars represent SEM for three biological replicates.

570

571 **Figure 6: The BphP-AlgB interaction is conserved in diverse bacteria.** A) Maximum  
572 likelihood-based phylogenetic tree for BphP showing the 150 closest orthologs to *P. aeruginosa*  
573 BphP, generated using MEGA-X software (Kumar et al., 2018). Co-occurrences of AlgB and KinB  
574 are depicted in red and blue, respectively. BphR is shown in purple. The other colors indicate

575 bacterial phyla. The black square indicates *Arabidopsis thaliana* as the root of the tree. B) *In vitro*  
576 phosphorylation of AlgB orthologs from the  $\alpha$ -Proteobacterium *Rhodospirillum centenum* (Rce),  
577 the  $\beta$ -Proteobacterium *Achromobacter xylosoxidans* (Axy), and the  $\gamma$ -Proteobacterium  
578 *Pseudomonas putida* (Ppu) by *P. aeruginosa* BphP-BV that had been autophosphorylated for 30  
579 min. The bottom panel shows that phospho-transfer from *P. aeruginosa* P~BphP-BV to *P.*  
580 *aeruginosa* NtrC does not occur.

581

582

## 583 MATERIALS AND METHODS

584 **Bacterial strains and growth conditions.** All strains and plasmids used in this study are listed  
585 in Supplemental Tables S3 and S4, respectively. *P. aeruginosa* PA14 and mutants were grown  
586 at 37°C in lysogeny broth (LB) (10 g tryptone, 5 g yeast extract, 5 g NaCl per L), in 1% Tryptone  
587 broth (TB) (10 g tryptone per L), or on LB plates fortified with 1.5% Bacto agar. When appropriate,  
588 antimicrobials were included at the following concentrations: 400 µg/mL carbenicillin, 30 µg/mL  
589 gentamycin, and 100 µg/mL irgasan. *Escherichia coli* was grown at 37°C in LB, or on LB plates  
590 fortified with 1.5% Bacto agar and the following concentrations of antimicrobials as appropriate:  
591 15 µg/mL gentamycin, 50 µg/mL kanamycin, and 100 µg/mL ampicillin. Isopropyl β-D-  
592 thiogalactopyranoside (IPTG, Sigma) was added to the medium at the indicated concentrations  
593 when appropriate.

594

595 **Mutant strain and plasmid construction.** Strains and plasmids were constructed as described  
596 previously (Mukherjee et al. 2017). Briefly, to construct marker-less in-frame chromosomal  
597 deletions and substitutions in PA14, DNA fragments flanking the gene of interest were amplified,  
598 assembled by the Gibson method (Gibson et al., 2009), and cloned into suicide vector pEXG2  
599 (Hmelo et al., 2015). The resulting plasmids were used to transform *E. coli* SM10λ<sub>pir</sub>, and  
600 subsequently, mobilized into PA14 strains via biparental mating. Exconjugants were selected on  
601 LB containing gentamicin and irgasan, followed by recovery of deletion mutants on LB medium  
602 containing 5% sucrose. Candidate mutants were confirmed by PCR and Sanger sequencing.  
603 Transposon insertions in the PA14 chromosome were generated by mating the PA14 Δ*rhIR* parent  
604 strain with *E. coli* SM10λ<sub>pir</sub> harboring pIT2 (IS*lacZ/hah*) (Jacobs et al., 2003). Insertion mutants  
605 were selected on LB agar containing 60 µg/mL tetracycline and 100 µg/mL irgasan was included  
606 in the agar to counter select against the *E. coli* donor. Transposon insertion locations were  
607 determined by arbitrary PCR and sequencing as described previously (Jacobs et al., 2003).

608 Protein production constructs were generated by amplifying the *algB*, *kinB*, and *bphP*  
609 coding regions and cloning them in pET28b or pET21b expression vectors (Novagen) to obtain  
610 pET28b-His6-AlgB, pET21b-KinB-His6, and pET21b-BphP-His6, respectively. To generate the  
611 AlgB<sup>D59N</sup>, KinB<sup>P390S</sup>, and BphP<sup>H513A</sup> variants, the corresponding mutations were engineered on to  
612 the pET28b-His6-AlgB, pET21b-KinB-His6, and pET21b-BphP-His6 plasmids, respectively, via  
613 Gibson assembly. AlgB orthologs from *R. centenum* (Rce) and *A. xylosoxidans* (Axy) were  
614 amplified from gene fragments obtained from Integrated DNA Technologies, and that from *P.*  
615 *putida* (Ppu) was amplified from the *P. putida* KT2440 genome. All of the gene orthologs were  
616 cloned into the pET28b plasmid.

617  
618 **Pyocyanin assay.** PA14 strains were grown overnight in LB liquid medium at 37°C with shaking  
619 at 250 rotations per minute (rpm). The cells were pelleted by centrifugation at 21,130 x g for 2 min  
620 and the clarified supernatants were passed through 0.22 µm filters (Millipore) into clear plastic  
621 cuvettes. The OD<sub>695</sub> of each sample was measured on a spectrophotometer (Beckman Coulter  
622 DV 730) and normalized to the culture cell density which was determined by OD<sub>600</sub>.

623  
624 **Colony biofilm assay.** The procedure for establishing colony biofilms has been described  
625 (Mukherjee et al., 2017). Briefly, 1 µL of overnight cultures of PA14 strains were spotted onto 60  
626 x 15 mm Petri plates containing 10 mL 1% TB medium fortified with 40 mg/L Congo red and 20  
627 mg/L Coomassie brilliant blue dyes and solidified with 1% agar. Biofilms were grown at 25°C for  
628 72 h in an incubator (Benchmark Scientific) and images were acquired using a Leica  
629 stereomicroscope M125 mounted with a Leica MC170 HD camera at 7.78x zoom.

630 For biofilms exposed to specific wavelengths of light, the following light-emitting diodes  
631 (LED) were used: blue – 430 nm (Diffused RGB LED, #159, Adafruit), red – 630 nm (Diffused  
632 RGB LED, #159, Adafruit), and far-red – 730 nm (LST1-01G01-FRD1-00, Opulent). Ambient light

633 exposure refers to biofilms grown under laboratory light conditions. For the biofilms shown in  
634 Figure 4A, light intensity was normalized by photon flux and the following intensities were used:  
635 blue ( $0.7 \text{ W/m}^2$ ), red ( $1 \text{ W/m}^2$ ), and far-red ( $1.1 \text{ W/m}^2$ ). Light intensity was calibrated using a laser  
636 power meter (Ophir) in a 5 nm window at the appropriate wavelength. Biofilm samples were grown  
637 in custom laser-cut acrylic chambers. Each chamber housed a single LED light source and an  
638 individual petri plate containing 4 technical replicates. Samples exposed to darkness were housed  
639 in the same chambers as the light-exposed samples, but with no current applied to the LEDs.

640

641 **qRT-PCR.** WT PA14 and mutant strains were harvested from planktonic cultures ( $\text{OD}_{600} = 1.0$ ) or  
642 from biofilms grown for 72 h. RNA was purified using the Zymo Research kit, and the preparations  
643 were subsequently treated with DNase (TURBO DNA-free™, Thermo Fisher). cDNA was  
644 synthesized using SuperScript® III Reverse Transcriptase (Invitrogen) and quantified using  
645 PerfeCTa® SYBR® Green FastMix® Low ROX (Quanta Biociences).

646

647 **Protein purification. His6-AlgB.** The pET28b-His6-AlgB protein production vector was  
648 transformed into *E. coli* BL21 (DE3) and the culture grown to  $\sim 0.8 \text{ OD}_{600}$  in 1 L of LB supplemented  
649 with  $50 \mu\text{g/mL}$  kanamycin at  $37^\circ\text{C}$  with shaking at 220 rpm. Protein production was induced by  
650 the addition of 1 mM IPTG, followed by incubation of the culture for another 3 h at  $25^\circ\text{C}$  with  
651 shaking. The cells were pelleted by centrifugation at  $16,100 \times g$  for 20 min and resuspended in  
652 AlgB-lysis buffer [ $50 \text{ mM NaH}_2\text{PO}_4$  pH 8.0,  $300 \text{ mM NaCl}$ ,  $1 \text{ mM MgCl}_2$ ,  $1 \text{ mM DTT}$ , 5% glycerol,  
653 0.1% Triton X-100, 10 mM Imidazole, and protease inhibitor cocktail (Roche)]. The preparation  
654 was frozen at  $-80^\circ\text{C}$  overnight. The frozen cell pellet was thawed on ice and the cells lysed by  
655 sonication (1 s pulses for 15 s). The sample was subjected to centrifugation at  $32,000 \times g$  for 30  
656 min at  $4^\circ\text{C}$ . The resulting clarified supernatant was combined with Ni-NTA resin (Novagen) and  
657 incubated for 3 h at  $4^\circ\text{C}$ . The bead/lysate mixture was loaded onto a 1 cm separation column  
658 (Bio-Rad), the resin was allowed to pack, and then it was washed with AlgB-wash buffer [ $50 \text{ mM}$



659  $\text{NaH}_2\text{PO}_4$  pH 8.0, 300 mM NaCl, 1 mM  $\text{MgCl}_2$ , 1 mM DTT, 5% glycerol, 0.1% Triton X-100, 30  
660 mM Imidazole, and protease inhibitor cocktail (Roche)]. Resin-bound His6-AlgB was eluted twice  
661 with 1 mL AlgB-wash buffer containing 250 mM Imidazole. Fractions were analyzed by SDS-  
662 PAGE and the gel was stained with Coomassie Brilliant Blue to assess His6-AlgB purity. Purified  
663 protein was dialyzed in AlgB-storage buffer [50 mM  $\text{NaH}_2\text{PO}_4$  pH 8.0, 300 mM NaCl, 1 mM  $\text{MgCl}_2$ ,  
664 1 mM DTT, 5% glycerol, and 0.1% Triton X-100], and stored at  $-80^\circ\text{C}$ .

665

666 **BphP-His6.** The pET21b-BphP-His6 protein production vector was transformed into *E. coli* BL21-  
667 CodonPlus (DE3)-RIPL (Agilent Technologies). BphP-His6 was purified as described for His6-  
668 AlgB with the following changes in buffers: BphP-lysis buffer [50 mM  $\text{NaH}_2\text{PO}_4$  pH 8.0, 300 mM  
669 NaCl, 1% Triton X-100, 0.1%  $\beta$ -mercaptoethanol, 10 mM Imidazole, and protease inhibitor  
670 cocktail (Roche)], BphP-wash buffer [50 mM  $\text{NaH}_2\text{PO}_4$  pH 8.0, 300 mM NaCl, 1% Triton X-100,  
671 0.1%  $\beta$ -mercaptoethanol, 30 mM Imidazole, and protease inhibitor cocktail (Roche)], and BphP-  
672 storage buffer [50 mM  $\text{NaH}_2\text{PO}_4$  pH 8.0, 300 mM NaCl, 1% Triton X-100, 0.1%  $\beta$ -  
673 mercaptoethanol, 5% glycerol].

674

675 **KinB-His6.** The pET21b-KinB-His6 protein production vector was transformed into *E. coli* BL21  
676 (DE3). KinB-His6 protein was purified exactly as described above for BphP-His6.

677

678 **Phosphorylation assays.** Autophosphorylation assays were performed with purified WT BphP  
679 and the BphP<sup>H513A</sup> variant or with KinB and the KinB<sup>P390S</sup> variant. 100  $\mu\text{M}$  BphP or BphP<sup>H513A</sup> was  
680 incubated under ambient light with 10-fold molar excess of Biliverdin (Sigma-Aldrich) for 1 h prior  
681 to the assay to form the light-activated BphP-BV stocks. Reactions were carried out in  
682 phosphorylation buffer [50 mM Tris pH 8.0, 100 mM KCl, 5 mM  $\text{MgCl}_2$ , and 10% (v/v) glycerol],  
683 and were initiated with the addition of 100  $\mu\text{M}$  ATP and 2  $\mu\text{Ci}$  [ $\gamma$ -<sup>32</sup>P]-ATP (Perkin Elmer).  
684 Reactions were incubated at room temperature and terminated by the addition of SDS-PAGE

685 loading buffer. Reaction products were separated using SDS-PAGE. Gels were dried at 80°C on  
686 filter paper under vacuum, exposed to a phosphoscreen overnight, and subsequently analyzed  
687 using a Typhoon 9400 scanner and ImageQuant software. For phosphotransfer to AlgB, an  
688 equimolar concentration of AlgB was added to the phospho-BphP-BV or phospho-KinB proteins.  
689 Reactions were incubated at room temperature for the indicated times and terminated by the  
690 addition of SDS-PAGE loading buffer.

691 Dephosphorylation of AlgB~P: 10 μM AlgB was phosphorylated for 30 min in reactions  
692 containing 10 μM BphP-BV, 100 μM ATP, and 2 μCi [ $\gamma$ -<sup>32</sup>P]-ATP in phosphorylation buffer.  
693 Subsequently, the reactions containing AlgB~P were applied to gel filtration spin columns (Probe  
694 Quant G-50, GE healthcare) to remove ATP. Dephosphorylation reactions were initiated by  
695 adding 10 μM KinB or KinB<sup>P390S</sup>. Aliquots were taken at the indicated times and analyzed as  
696 described above.

697  
698 **Phos-Tag SDS-PAGE and Western Blotting.** WT PA14 and mutant strains were harvested from  
699 planktonic cultures (OD<sub>600</sub> = 1.0). Cells were resuspended in 100 μl of ice-cold BugBuster reagent  
700 (Novagen) containing EDTA-free Protease Inhibitor Cocktail (Roche), followed by end-over-end  
701 rotation on a nutator at room temperature for 30 min. Cell debris was removed by centrifugation  
702 (4°C at 10,000 rpm for 1 min). 50 μL of 4x SDS-PAGE loading buffer (Thermo Fisher Scientific)  
703 containing 15% β-mercaptoethanol was combined with 50 μL of the sample supernatant. 10 μL  
704 of samples were loaded onto a 12.5% SuperSep™ Phos-tag™ gel (Wako Pure Chemical  
705 Industries). Samples were subjected to electrophoresis at 4°C for 3 h. Gels were incubated for 20  
706 min on a shaking platform in 1x transfer buffer containing 1 mM EDTA, and re-equilibrated for 20  
707 min in 1x transfer buffer lacking EDTA. Proteins were transferred to nitrocellulose membranes,  
708 blocked with 5% skim milk in TBS at room temperature for 1 h, and incubated with primary anti-  
709 FLAG antibody (Sigma Aldrich) at 1:5000 dilution in 5% skim milk in TBS overnight 4°C on a  
710 rocking platform. Membranes were washed three times with TBS-Tween 20 at room temperature

711 for 10 min, on a rocking platform, and subsequently developed with SuperSignal West Femto Kit  
712 (Thermo Scientific) and captured with LAS-4000 Imager (GE Healthcare).

713

714 **Whole genome sequencing.** *P. aeruginosa* strains were harvested from planktonic cultures  
715 (OD<sub>600</sub> = 2.0) and DNA was purified using DNeasy Blood & Tissue kit (Qiagen). The Nextera DNA  
716 Library Prep kit (Illumina, CA) was employed with 2 ng of genomic DNA to prepare the library.  
717 Unique barcodes were added to each sample to enable multiplexing. The libraries were examined  
718 for quality using Bioanalyzer DNA High Sensitivity chips (Agilent, CA) and quantified using a Qubit  
719 fluorometer (Invitrogen, CA). DNA libraries from the different strains were pooled at equal molar  
720 amounts and sequenced using an Illumina MiSeq as pair-end 2x100 nt reads. Only the Pass-  
721 Filter (PF) reads were used for further analysis.

722 Whole-genome sequencing data were processed with breseq version 0.33.2 to identify  
723 mutations relative to the reference *P. aeruginosa* UCBPP-PA14 genome  
724 ([www.pseudomonas.com](http://www.pseudomonas.com); Winsor et al., 2016). All high-confidence and putative SNPs and  
725 deletion events were confirmed by a manual examination of the read pileups with GenomeViewer  
726 IGV 2.4.8. A sample collected prior to the suppressor mutation screen was aligned against the  
727 reference genome of PA14, yielding a manually curated list of 25 differences acquired by our  
728 laboratory strain prior to the experiment (19 SNPs, 6 single-nucleotide indels). Applying these  
729 differences to PA14 using gdttools (part of the breseq package) yielded an updated reference  
730 genome against which all other samples were compared. Table S2 reports all high-confidence  
731 mutations identified in this analysis.

732

733

734 **REFERENCES**

- 735 ASTM G173-03(2012), Standard Tables for Reference Solar Spectral Irradiances: Direct Normal  
736 and Hemispherical on 37° Tilted Surface, ASTM International, West Conshohocken, PA, 2012,  
737 [www.astm.org](http://www.astm.org).
- 738 Beattie, G.A., Hatfield, B.M., Dong, H., and Mcgrane, R.S. (2018). Seeing the Light : The Roles  
739 of Red- and Blue-Light Sensing in Plant Microbes. *Annu. Rev. Phytopathol.* *56*, 41–66.
- 740 Bhardwaj, V., Meier, S., Petersen, L.N., Ingle, R.A., and Roden, L.C. (2011). Defence Responses  
741 of *Arabidopsis thaliana* to Infection by *Pseudomonas syringae* Are Regulated by the Circadian  
742 Clock. *PLoS ONE* *6*, 1–8.
- 743 Bhate, M.P., Molnar, K.S., Goulian, M., and Degrado, W.F. (2015). Review Signal Transduction  
744 in Histidine Kinases : Insights from New Structures. *Struct. Des.* *23*, 981–994.
- 745 Bhoo, S.H., Davis, S.J., Walker, J., Karniol, B., and Vierstra, R.D. (2001). Bacteriophytochromes  
746 are photochromic histidine kinases using a biliverdin chromophore. *Nature* *414*, 776–779.
- 747 Bonomi, H.R., Toum, L., Sycz, G., Sieira, R., Toscani, A.M., Gudesblat, G.E., Leskow, F.C.,  
748 Goldbaum, F.A., Vojnov, A.A., and Malamud, F. (2016). *Xanthomonas campestris* attenuates  
749 virulence by sensing light through a bacteriophytochrome photoreceptor . *EMBO Rep.* *17*, 1565–  
750 1577.
- 751 Brint, J.M., and Ohman, D.E. (1995). Synthesis of Multiple Exoproducts in *Pseudomonas*  
752 *aeruginosa* is under the control of RhIR-RhII, another Set of Regulators in Strain PAO1 with  
753 Homology to the Autoinducer-Responsive LuxR-LuxI Family. *J. Bacteriol.* *177*, 7155–7163.
- 754 Bush, M., and Dixon, R. (2012). The Role of Bacterial Enhancer Binding Proteins as Specialized  
755 Activators of  $\sigma^{54}$ -Dependent Transcription. *Microbiol. Mol. Biol. Rev.* *76*, 497–529.
- 756 Capra, E.J., and Laub, M.T. (2012). Evolution of Two-Component Signal Transduction Systems.  
757 *Annu. Rev. Microbiol.* *66*, 325–47.
- 758 Chand, N.S., Lee, J.S.W., Clatworthy, A.E., Golas, A.J., Smith, R.S., and Hung, D.T. (2011). The  
759 sensor kinase KinB regulates virulence in acute *Pseudomonas aeruginosa* infection. *J. Bacteriol.*  
760 *193*, 2989–2999.
- 761 Chand, N.S., Clatworthy, A.E., and Hung, D.T. (2012). The two-component sensor KinB acts as  
762 a phosphatase to regulate *Pseudomonas aeruginosa* Virulence. *J. Bacteriol.* *194*, 6537–6547.
- 763 Curtis, A.M., Bellet, M.M., Sassone-corsi, P., and Neill, L.A.J.O. (2014). Circadian Clock Proteins  
764 and Immunity. *Immunity* *40*, 178–186.
- 765 Davies, D.G., Parsek, M.R., Pearson, J.P., Iglewski, B.H., Costerton, J.W., and Greenberg, E.P.  
766 (1998). The Involvement of Cell-to-Cell Signals in the Development of a Bacterial Biofilm. *Science*  
767 *280*, 295–298.
- 768 Donnell, A.J.O., Schneider, P., Mcwatters, H.G., and Reece, S.E. (2011). Fitness costs of  
769 disrupting circadian rhythms in malaria parasites. *Proc. Biol. Sci.* *278*, 2429–2436.
- 770 Duran, P., Thiergart, T., Garrido-oter, R., Agler, M., Kemen, E., Schulze-lefert, P., Thiergart, T.,  
771 Garrido-oter, R., Agler, M., Kemen, E., et al. (2018). Microbial Interkingdom Interactions in Roots  
772 Promote *Arabidopsis* Survival Article Microbial Interkingdom Interactions in Roots Promote  
773 *Arabidopsis* Survival. *Cell* *175*, 973–983.

- 774 Edgar, R.S., Stangherlin, A., Nagy, A.D., Nicoll, M.P., Efstathiou, S., O'Neill, J.S., and Reddy,  
775 A.B. (2016). Cell autonomous regulation of herpes and influenza virus infection by the circadian  
776 clock. *Proc. Natl. Acad. Sci. USA* *113*, 10085–10090.
- 777 Fazli, M., Almlad, H., Rybtke, M.L., Givskov, M., Eberl, L., and Tolker-Nielsen, T. (2014).  
778 Regulation of biofilm formation in *Pseudomonas* and *Burkholderia* species. *Environ. Microbiol.*  
779 *16*, 1961–1981.
- 780 Flemming, H., and Wingender, J. (2010). The biofilm matrix. *Nat. Rev. Microbiol.* *8*, 623–633.
- 781 Flemming, H.C., Wingender, J., Szewzyk, U., Steinberg, P., Rice, S.A., and Kjelleberg, S. (2016).  
782 Biofilms: An emergent form of bacterial life. *Nat. Rev. Microbiol.* *14*, 563–575.
- 783 Friedman, L., and Kolter, R. (2004). Genes involved in matrix formation in *Pseudomonas*  
784 *aeruginosa* PA14 biofilms. *Mol. Microbiol.* *51*, 675–690.
- 785 Gibson, D.G., Young, L., Chuang, R.-Y., Venter, J.C., Hutchison, C. a, Smith, H.O., Iii, C.A.H.,  
786 and America, N. (2009). Enzymatic assembly of DNA molecules up to several hundred kilobases.  
787 *Nat. Methods* *6*, 343–345.
- 788 Gomelsky, M., and Hoff, W.D. (2011). Light helps bacteria make important lifestyle decisions.  
789 *Trends Microbiol.* *19*, 441–448.
- 790 Gourinchas, G., Ettl, S., and Winkler, A. (2019). Bacteriophytochromes – from informative model  
791 systems of phytochrome function to powerful tools in cell biology. *Curr. Opin. Struct. Biol.* *57*, 72–  
792 83.
- 793 Hmelo, L.R., Borlee, B.R., Almlad, H., Love, M.E., Randall, T.E., Tseng, B.S., Lin, C., Irie, Y.,  
794 Storek, K.M., Yang, J.J., et al. (2015). Precision-engineering the *Pseudomonas aeruginosa*  
795 genome with two-step allelic exchange. *Nat. Protoc.* *10*, 1820–1841.
- 796 Horst, M.A. Van Der, Key, J., and Hellingwerf, K.J. (2007). Photosensing in chemotrophic , non-  
797 phototrophic bacteria: let there be light sensing too. *Trends Microbiol.* *15*, 554-62.
- 798 Jacobs, M.A., Alwood, A., Thaipisuttikul, I., Spencer, D., Haugen, E., Ernst, S., Will, O., Kaul, R.,  
799 Raymond, C., Levy, R., et al. (2003). Comprehensive transposon mutant library of *Pseudomonas*  
800 *aeruginosa*. *Proc Natl Acad Sci USA* *100*, 14339–14344.
- 801 Kobayashi, M., Kikuchi, D., and Okamura, H. (2009). Imaging of ultraweak spontaneous photon  
802 emission from human body displaying diurnal rhythm. *PLoS One* *4*, 4–7.
- 803 Koo, H., Allan, R.N., Howlin, R.P., Stoodley, P., and Hall-Stoodley, L. (2017). Targeting microbial  
804 biofilms: Current and prospective therapeutic strategies. *Nat. Rev. Microbiol.* *15*, 740–755.
- 805 Kottke, T., Xie, A., Larsen, D.S., and Hoff, W.D. (2018). Photoreceptors Take Charge : Emerging  
806 Principles for Light Sensing. *Annu. Rev. Biophys.* *47*, 291–313.
- 807 Kumar, S., Stecher, G., Li, M., Knyaz, C., and Tamura, K. (2018). MEGA X: Molecular  
808 Evolutionary Genetics Analysis across Computing Platforms. *Mol. Biol. Evol.* *35*, 1547–1549.
- 809 Lee, H.-J., Park, C.-M., Oh, K.-H., Shin, K., Choi, H.-K., Hyeon, T., Kim, S.-G., Ha, J.-H., Baldwin,  
810 I.T., Han, Y.-J., et al. (2016). Stem-piped light activates phytochrome B to trigger light responses  
811 in *Arabidopsis thaliana* roots. *Sci. Signal.* *9*, ra106-ra106.
- 812 Liu, C., Sun, D., Zhu, J., and Liu, W. (2019). Two-component signal transduction systems: A major  
813 strategy for connecting input stimuli to biofilm formation. *Front. Microbiol.* *9*, 3279.

- 814 Ma, S., Wozniak, D.J., and Ohman, D.E. (1997). Identification of the histidine protein kinase KinB  
815 in *Pseudomonas aeruginosa* and its phosphorylation of the alginate regulator AlgB. *J. Biol. Chem.*  
816 *272*, 17952–17960.
- 817 Ma, S., Selvaraj, U., Ohman, D.E., Quarless, R., Hassett, D.J., and Wozniak, D.J. (1998).  
818 Phosphorylation-independent activity of the response regulators AlgB and AlgR in promoting  
819 alginate biosynthesis in mucoid *Pseudomonas aeruginosa*. *J. Bacteriol.* *180*, 956–968.
- 820 A´vila-Pe´rez, Hellingwerf, K.J., and Kort, R. (2006). Blue Light Activates the  $\sigma^B$ -Dependent Stress  
821 Response of *Bacillus subtilis* via YtvA. *J. Bacteriol.* *188*, 6411–6414.
- 822 Mathews, S. (2006). Phytochrome-mediated development in land plants: red light sensing  
823 evolves to meet the challenges of changing light environments. *Mol. Ecol.* *15*, 3483–3503.
- 824 de Wit, M., Spoel, S.H., Sanchez-Perez, G.F., Gommers, C.M.M., Pieterse, C.M.J., Voeselek,  
825 L.A.C.J., and Pierik, R. (2013). Perception of low red : far-red ratio compromises both salicylic  
826 acid- and jasmonic acid-dependent pathogen defences in Arabidopsis. *Plant J.* *75*, 90–103.
- 827 Mukherjee, S., and Bassler, B.L. (2019). Bacterial quorum sensing in complex and dynamically  
828 changing environments. *Nat. Rev. Microbiol.* *17*, 371–382.
- 829 Mukherjee, S., Moustafa, D., Smith, C.D., Goldberg, J.B., and Bassler, B.L. (2017). The RhIR  
830 quorum-sensing receptor controls *Pseudomonas aeruginosa* pathogenesis and biofilm  
831 development independently of its canonical homoserine lactone autoinducer. *PLoS Pathog.* *13*,  
832 1–25.
- 833 Mukherjee, S., Moustafa, D.A., Stergioula, V., Smith, C.D., and Goldberg, J.B. (2018). The PqsE  
834 and RhIR proteins are an autoinducer synthase – receptor pair that control virulence and biofilm  
835 development in *Pseudomonas aeruginosa*. *Proc. Natl. Acad. Sci. USA* *115*, E9411–E9418.
- 836 Neukermans, J., Li, S., Aro, E., Noctor, G., and Kangasja, S. (2012). Photosynthesis,  
837 photorespiration, and light signalling in defence responses. *J. Exp. Bot.* *63*, 1619–1636.
- 838 Pendleton, J.N., Gorman, S.P., Gilmore, B.F. (2013). Clinical relevance of the ESKAPE  
839 pathogens. *Expert. Rev. Anti-Infective Therapy.* *1(3)*, 297-308.
- 840 Pruß, B.M. (2017). Involvement of Two-Component Signaling on Bacterial Motility and Biofilm  
841 Development. *J. Bacteriol.* *199*, 1–12.
- 842 Purcell, E.B., Siegal-Gaskins, D., Rawling, D.C., Fiebig, A., and Crosson, S. (2007). A  
843 photosensory two-component system regulates bacterial cell attachment. *Proc. Natl. Acad. Sci.*  
844 *USA* *104*, 18241–18246.
- 845 Rice, L.B. (2008). Federal funding for the study of Antimicrobial Resistance in Nosocomial  
846 Pathogens: No ESKAPE. *J. Infect. Dis.* *197*, 1079-81.
- 847 Roden, L.C., and Ingle, R.A. (2009). Lights, Rhythms, Infection: The Role of Light and the  
848 Circadian Clock in Determining the Outcome of Plant – Pathogen Interactions. *The Plant Cell* *21*,  
849 2546–2552.
- 850 Rumbaugh, K.P., Griswold, J.A., and Hamood, A.N. (2000). The role of quorum sensing in the in  
851 vivo virulence of *Pseudomonas aeruginosa*. *Microbes Infect.* *2*, 1721–1731.
- 852 Rutherford, S.T., and Bassler, B.L. (2012). Bacterial Quorum Sensing: Its Role in Virulence and  
853 Possibilities for Its Control. *Cold Spring Harb. Perspect. Med.* *2*, 1–26.
- 854 Scheiermann, C., Kunisaki, Y., and Frenette, P.S. (2013). Circadian control of the immune



- 855 system. *Nat. Rev. Immunol.* **13**, 190–198.
- 856 Shcherbakova, D.M., Shemetov, A.A., Kaberniuk, A.A., and Verkhusha, V. V (2015). Natural  
857 Photoreceptors as a Source of Fluorescent Proteins , Biosensors , and Optogenetic Tools. *Annu.*  
858 *Rev. Biochem.* **84**, 519–50.
- 859 Shimazaki, K., Doi, M., Assmann, S.M., and Kinoshita, T. (2007). Light Regulation of Stomatal  
860 Movement. *Annu. Rev. Plant Biol.* **58**, 219–47.
- 861 Smith, H. (2000). Phytochromes and light signal perception by plants—an emerging synthesis.  
862 *Nature* **407**, 585–591.
- 863 Starkey, M., and Rahme, L.G. (2009). Modeling *Pseudomonas aeruginosa* pathogenesis in plant  
864 hosts. *Nat. Protoc.* **4**, 117–124.
- 865 Sundar, I.K., Ahmad, T., Yao, H., Hwang, J., Gerloff, J., Lawrence, B.P., Sellix, M.T., and  
866 Rahman, I. (2015). Influenza A virus-dependent remodeling of pulmonary clock function in a  
867 mouse model of COPD. *Sci. Rep.* **5**, 1–14.
- 868 Swartz, T.E., Tseng, T., Frederickson, M.A., Paris, G., Comerci, D.J., Rajashekara, G., Kim, J.,  
869 Mudgett, M.B., Splitter, G.A., Ugalde, R.A., et al. (2007). Blue-Light-Activated Histidine Kinases:  
870 Two-Component Sensors in Bacteria. *Science* **317**, 1090–1094.
- 871 Tacconelli, E., Carmell, Y., Harbarth, S., Kahlmeter, G., Kluytmans, J., Mendelson, M., et al.  
872 (2017). Global priority list of antibiotic-resistant bacteria to guide research, discovery, and  
873 development of new antibiotics. WHO Press Release.
- 874 Tasler, R., Moises, T., and Frankenberg-Dinkel, N. (2005). Biochemical and spectroscopic  
875 characterization of the bacterial phytochrome of *Pseudomonas aeruginosa*. *FEBS J.* **272**, 1927–  
876 1936.
- 877 Winsor GL, Griffiths EJ, Lo R, Dhillon BK, Shay JA, Brinkman FS. Enhanced annotations and  
878 features for comparing thousands of *Pseudomonas* genomes in the *Pseudomonas* genome  
879 database. *Nucleic Acids Res.* 2016. doi: 10.1093/nar/gkv1227
- 880 Wozniak, D.J., and Ohman, D.E. (1991). *Pseudomonas aeruginosa* AlgB, a Two-Component  
881 Response Regulator of the NtrC Family, Is Required for algD Transcription. *J. Bacteriol.* **173**,  
882 1406–1413.
- 883 Wozniak, D.J., Wyckoff, T.J.O., Starkey, M., Keyser, R., Azadi, P., Toole, G.A.O., and Parsek,  
884 M.R. (2003). Alginate is not a significant component of the extracellular polysaccharide matrix of  
885 PA14 and PAO1 *Pseudomonas aeruginosa* biofilms. *Proc. Natl. Acad. Sci. USA* **100**, 7907–7912.
- 886 Wu, L., McGrane, R.S., and Beattie, G.A. (2013). Light Regulation of Swarming Motility in  
887 *Pseudomonas syringae* Integrates Signaling Pathways Mediated by a Bacteriophytochrome and  
888 a LOV Protein. *MBio* **4**, 1–9.
- 889

# Mukherjee Figure 1

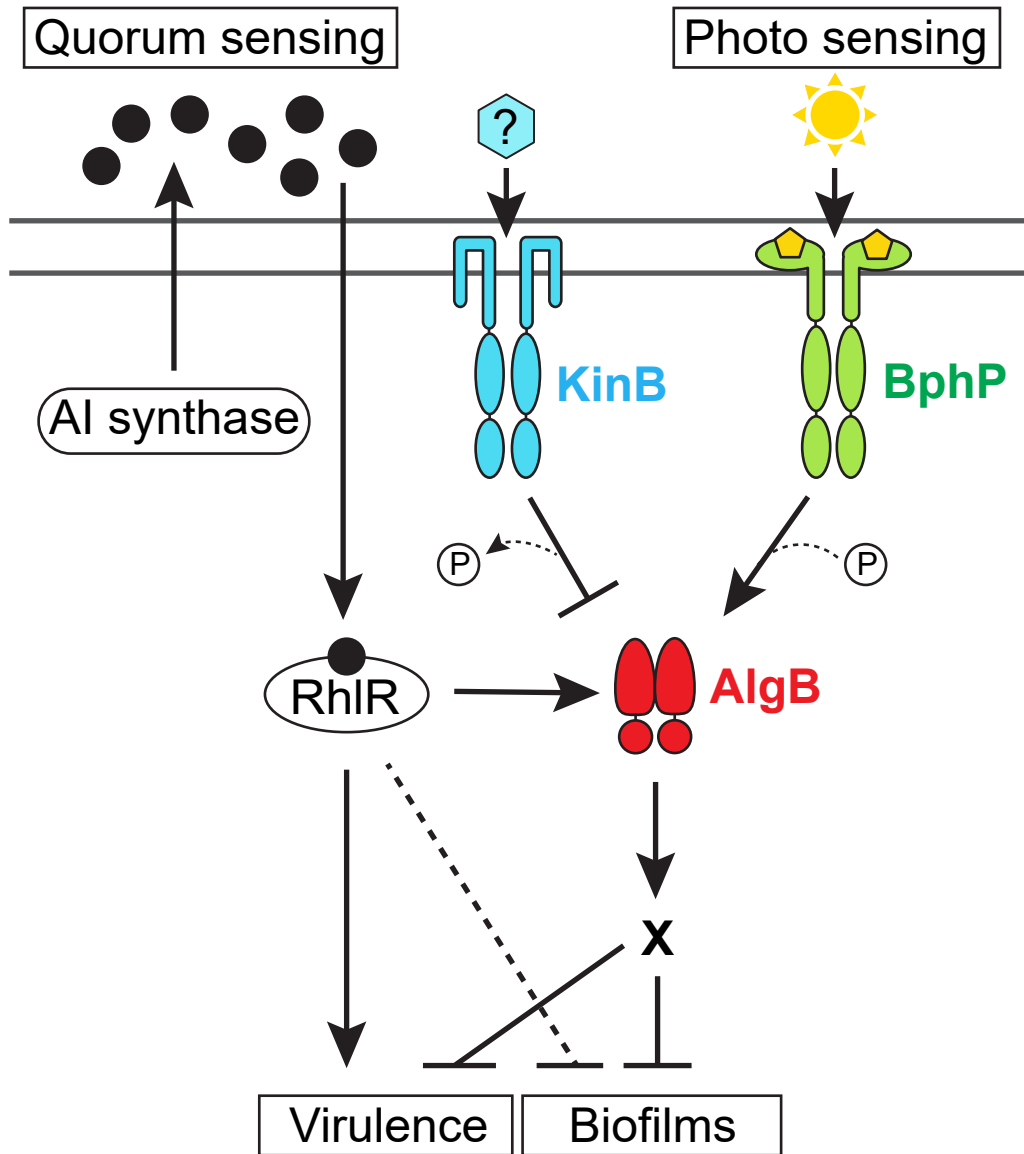



## Mukherjee Figure 2

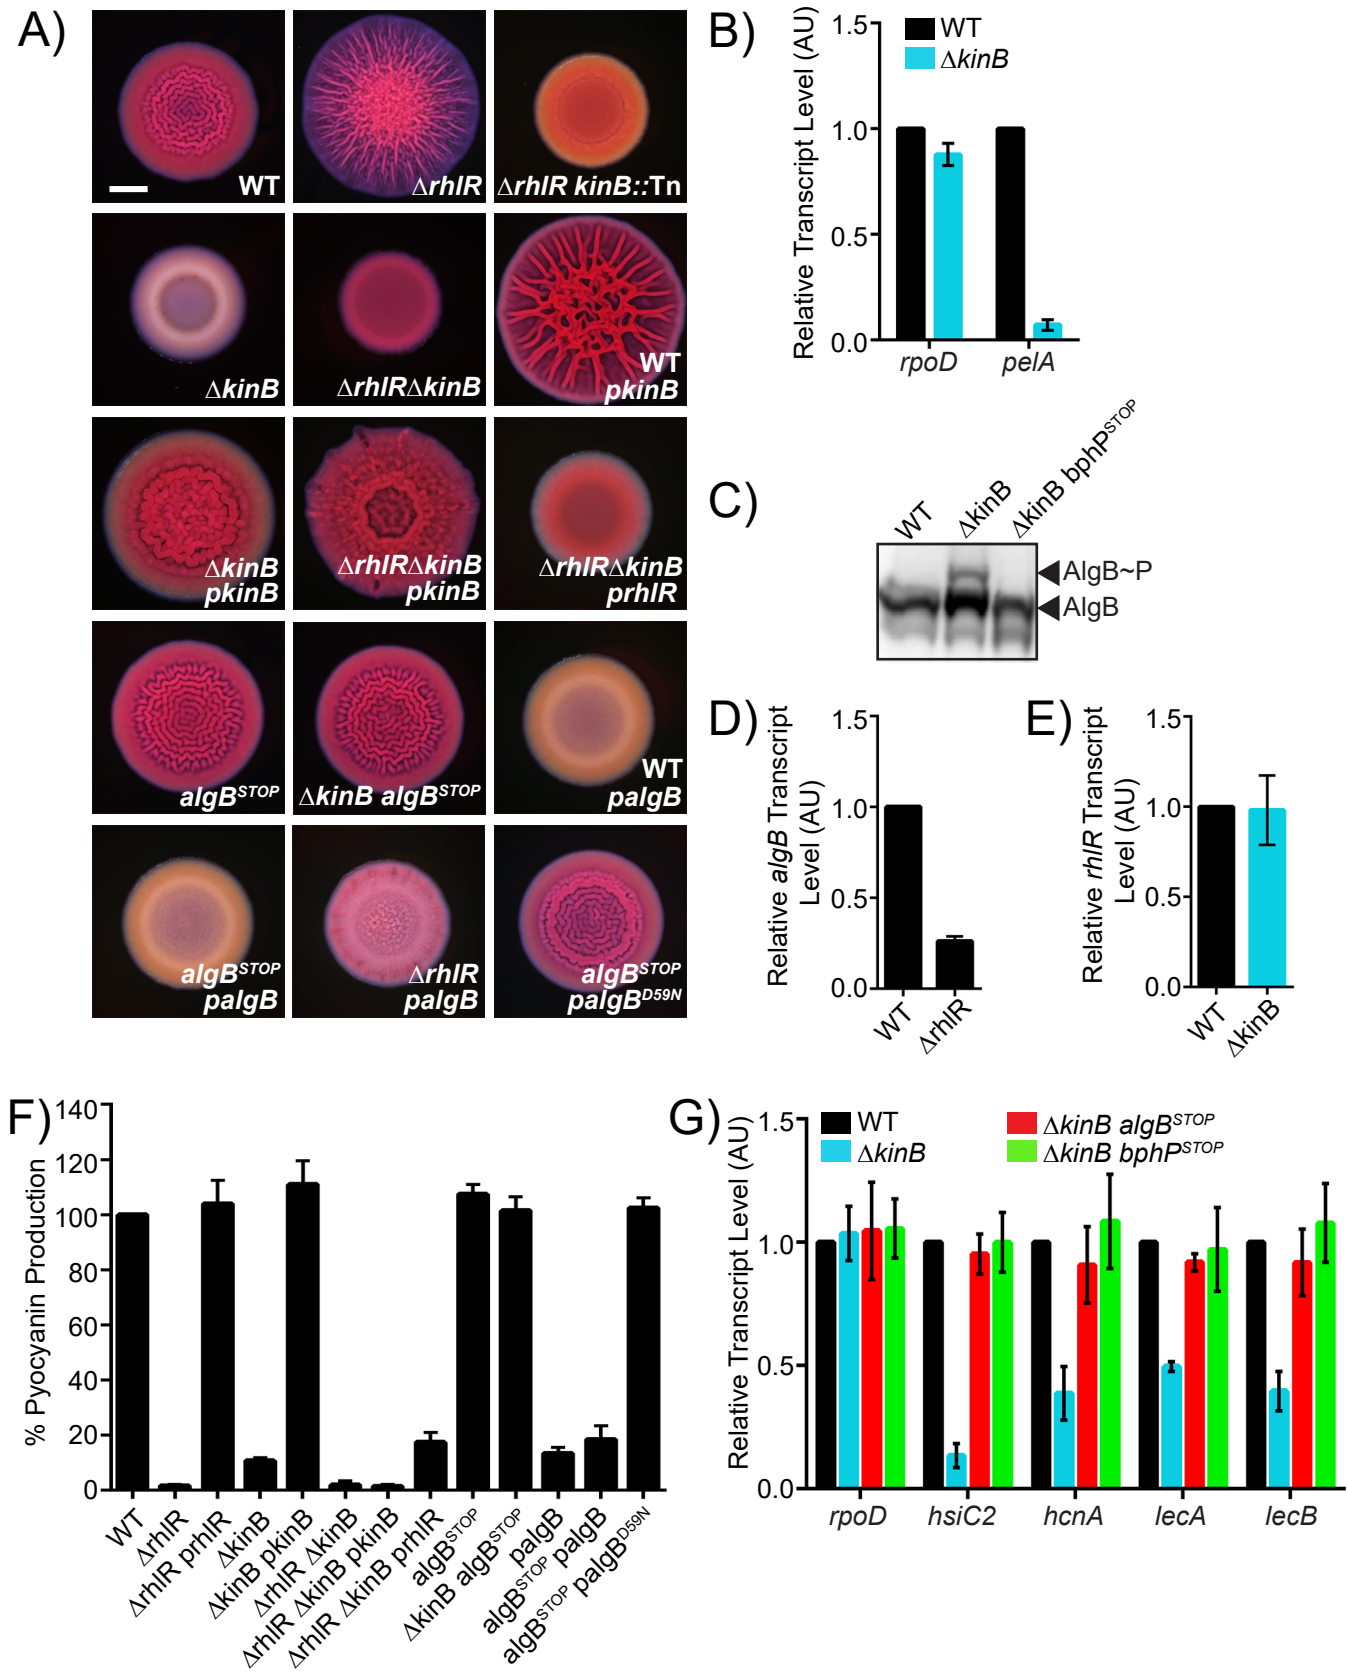

## Mukherjee Figure 3

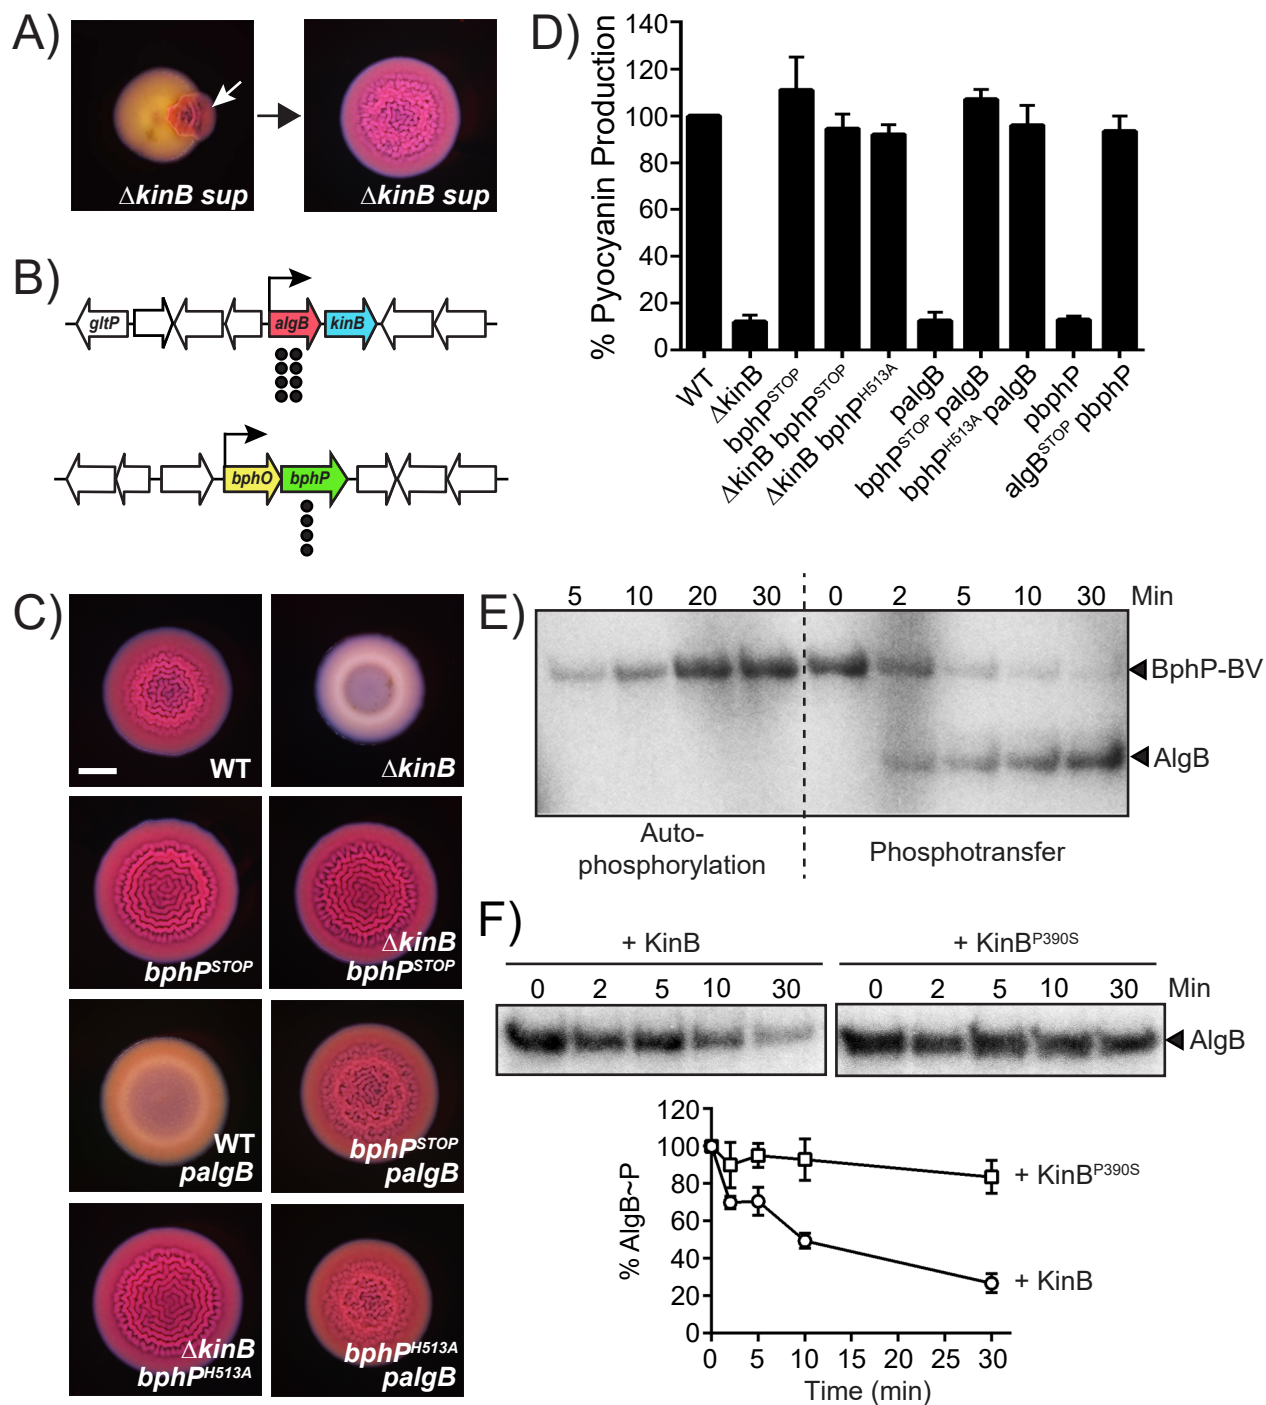

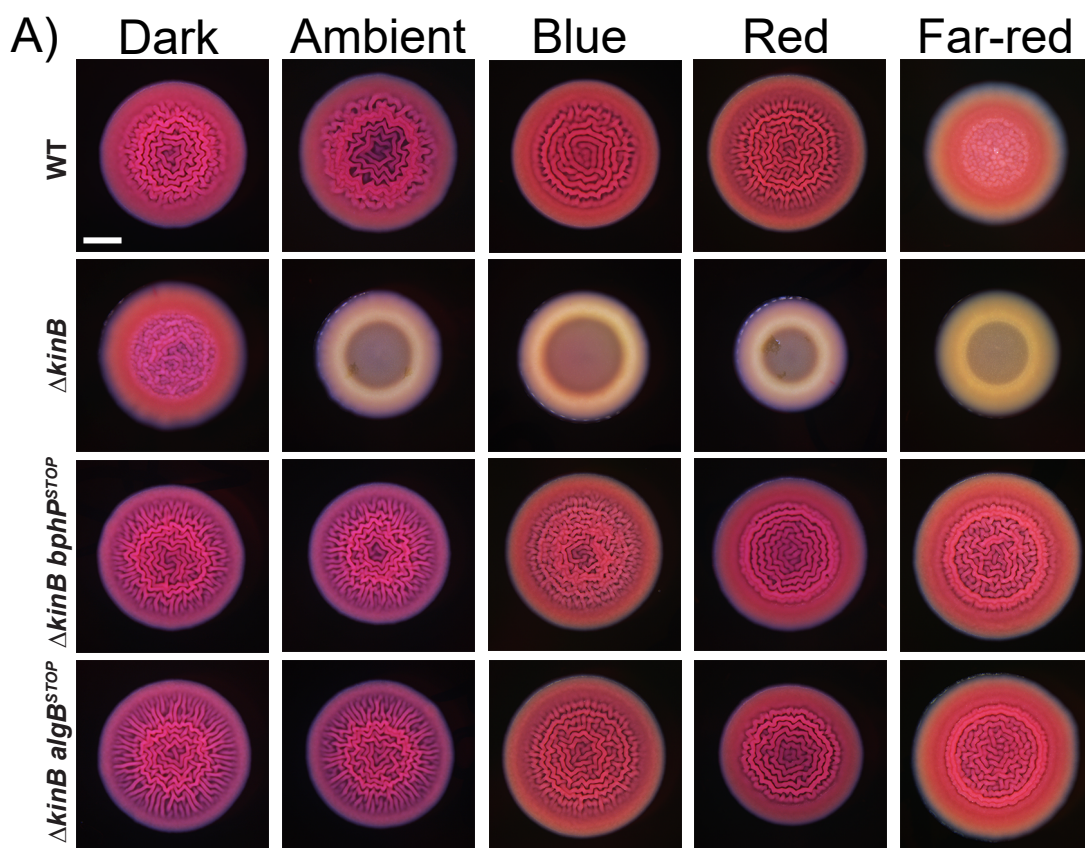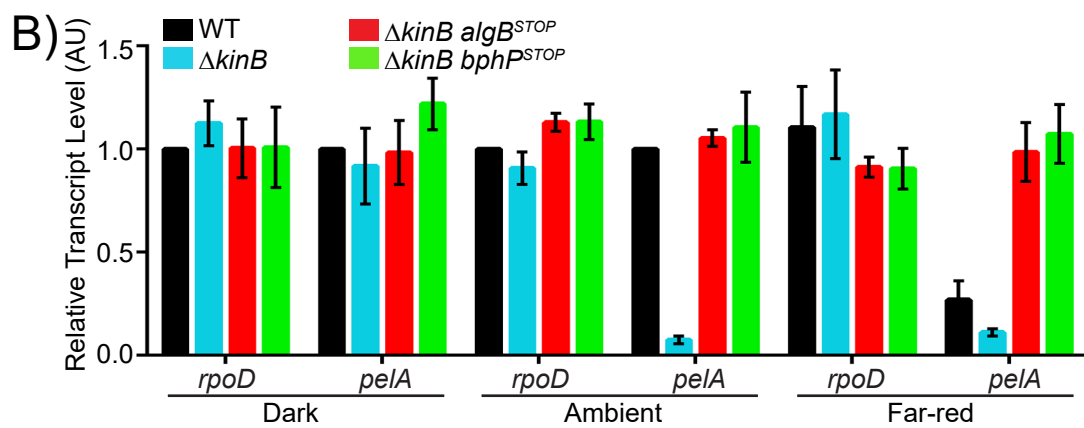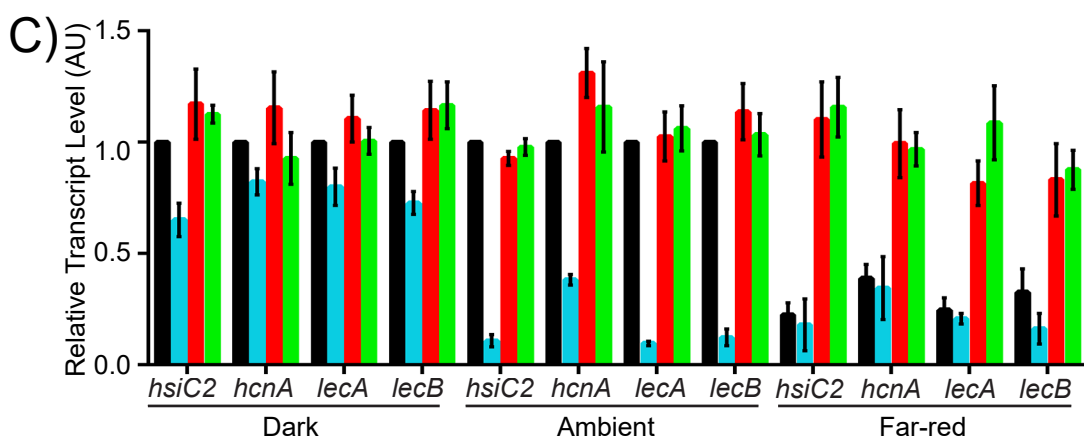

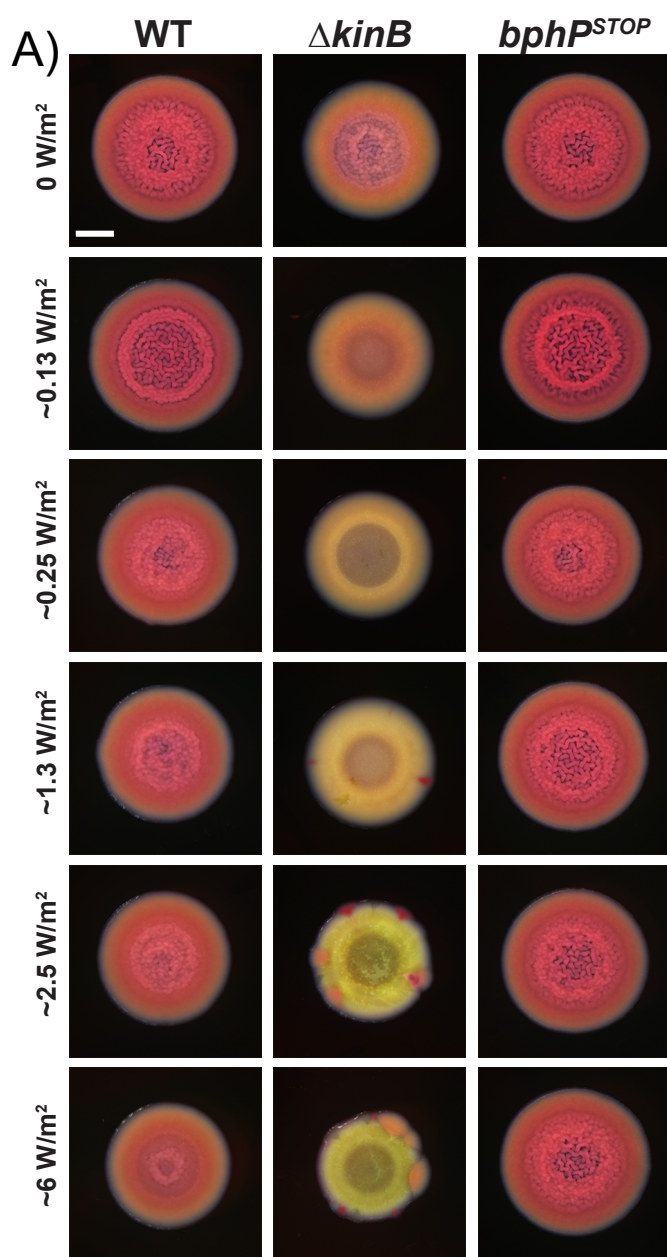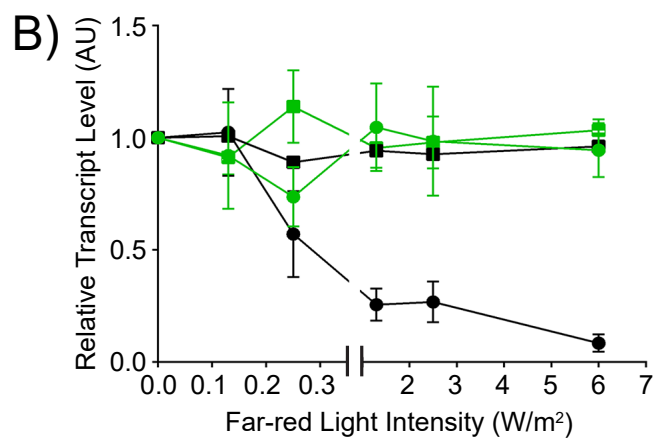



## Mukherjee Figure 6

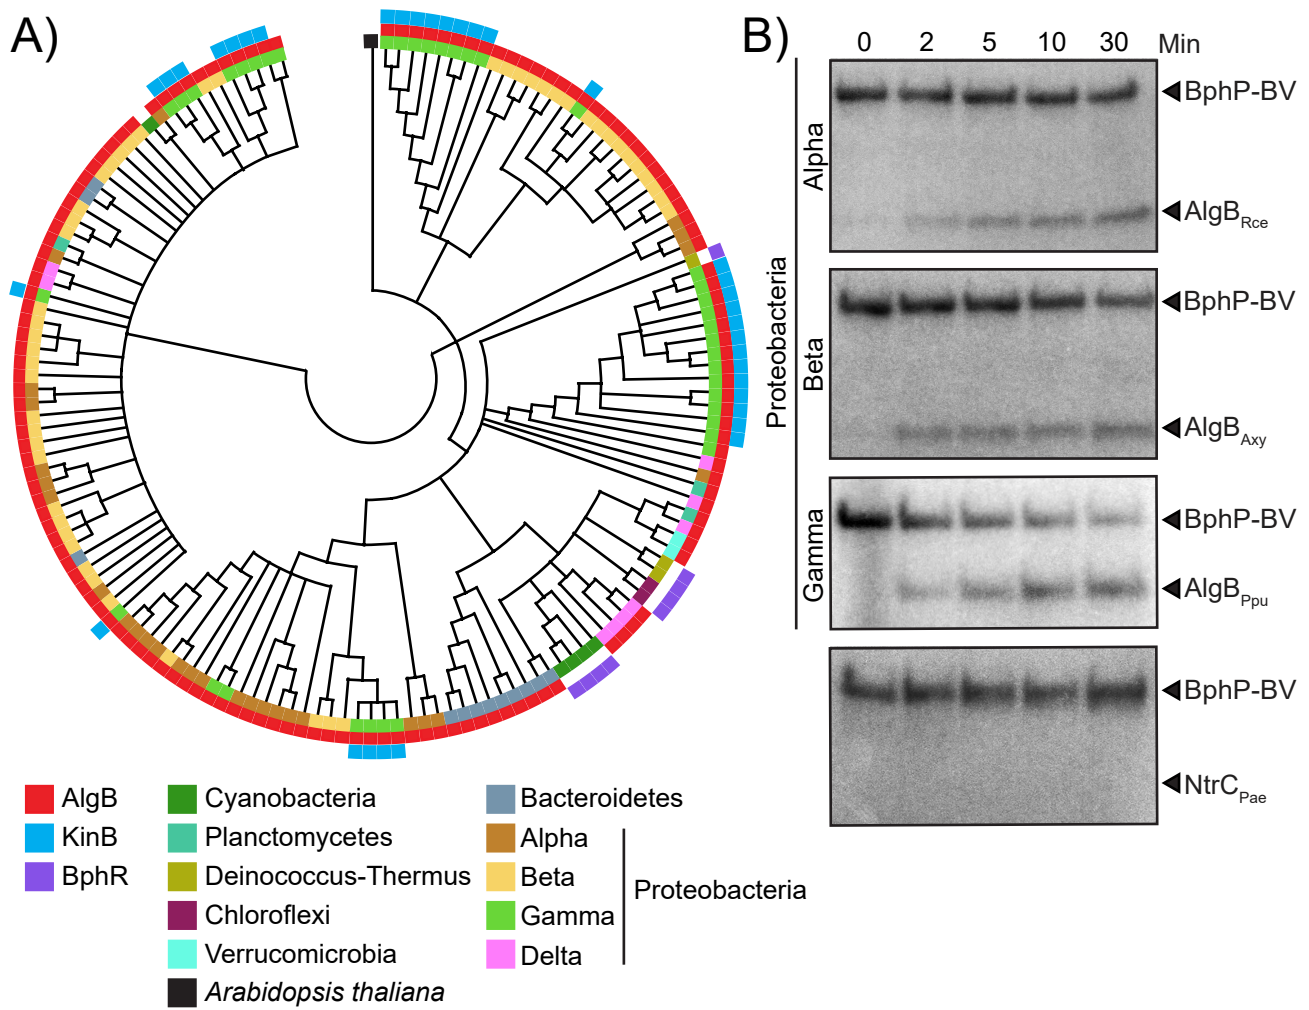

Source: https://www.biorxiv.org/content/10.1101/747618v1.full.pdf
